# Supplementary material for: Lateral entorhinal cortex inputs modulate hippocampal dendritic excitability by recruiting a local disinhibitory microcircuit
Source: PubMed Central journal article supplement — Cell Rep. Author manuscript; Available in PMC 2023 Jul 12. (PMC10337264; doi:10.1016/j.celrep.2022.111962), 2023-01-04
Supplement: NIHMS1870511-supplement-1.pdf [file NIHMS1870511-supplement-1.pdf]

**Cell Reports, Volume 42**

**Supplemental information**

**Lateral entorhinal cortex inputs modulate  
hippocampal dendritic excitability  
by recruiting a local disinhibitory microcircuit**

**Olesia M. Bilash, Spyridon Chavlis, Cara D. Johnson, Panayiota Poirazi, and Jayeeta Basu**

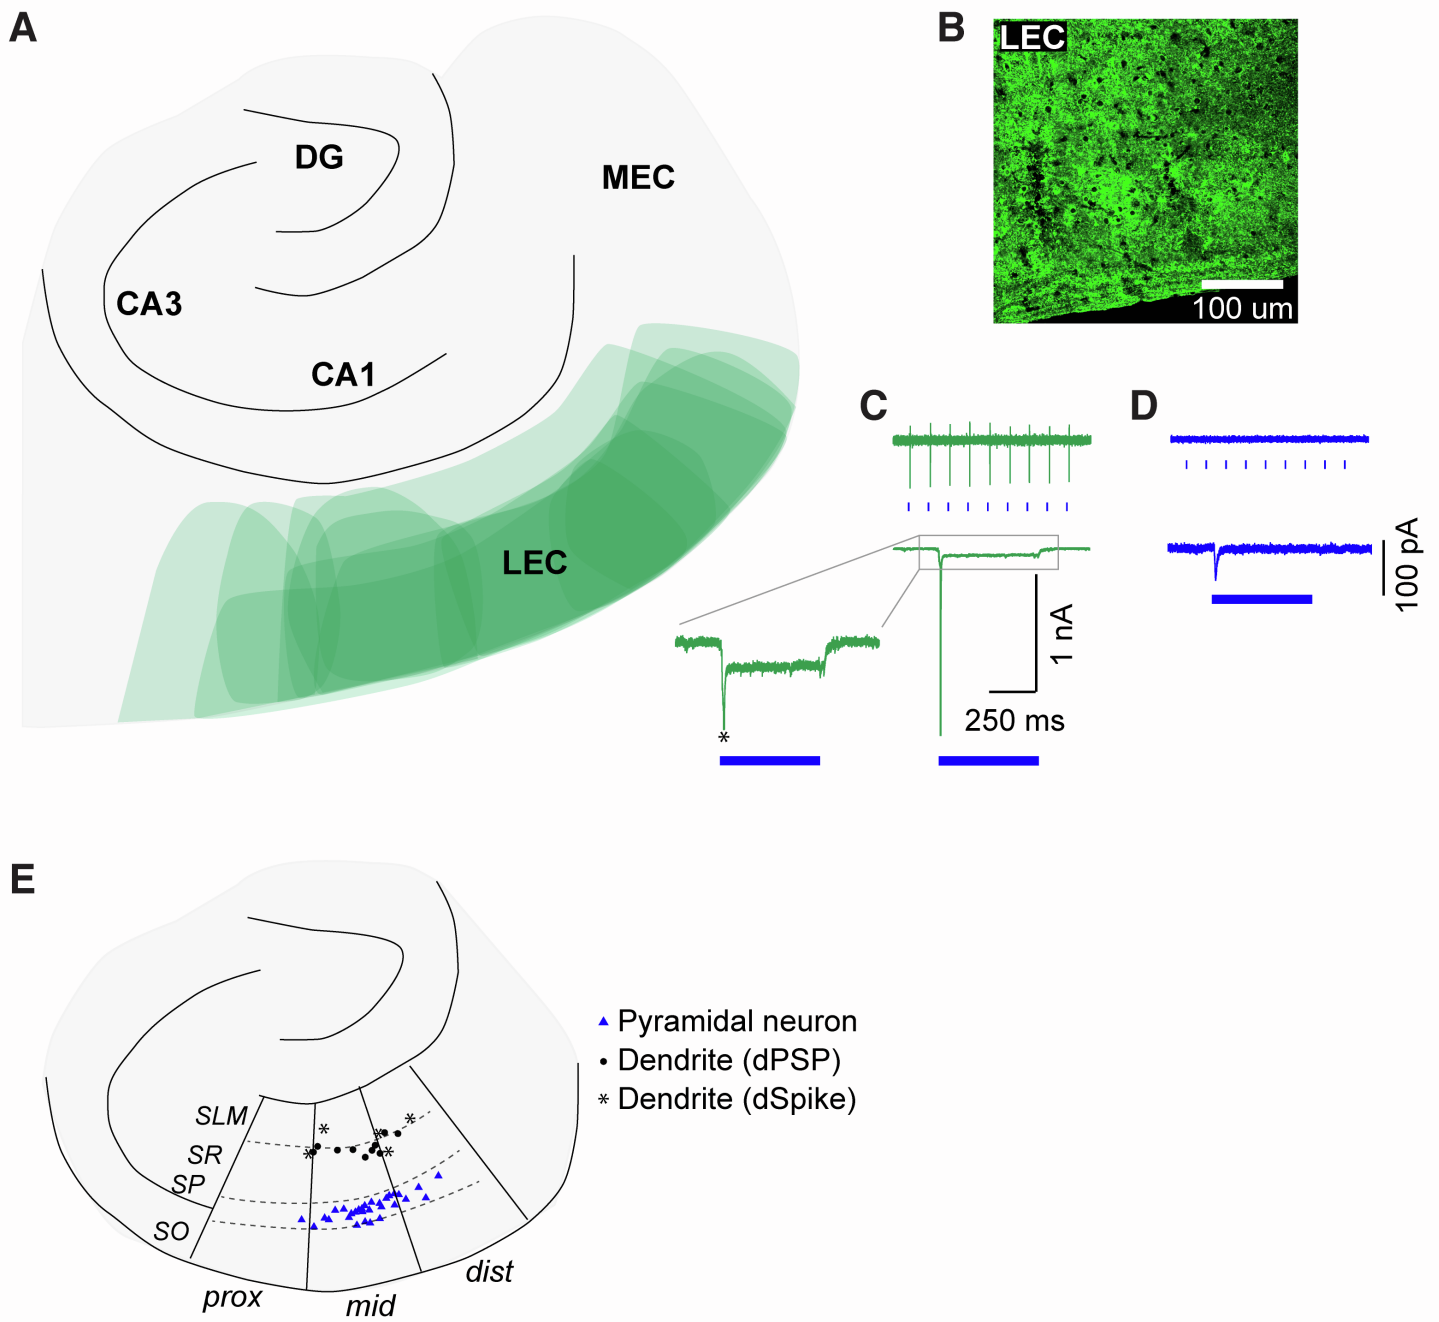

**Figure S1**

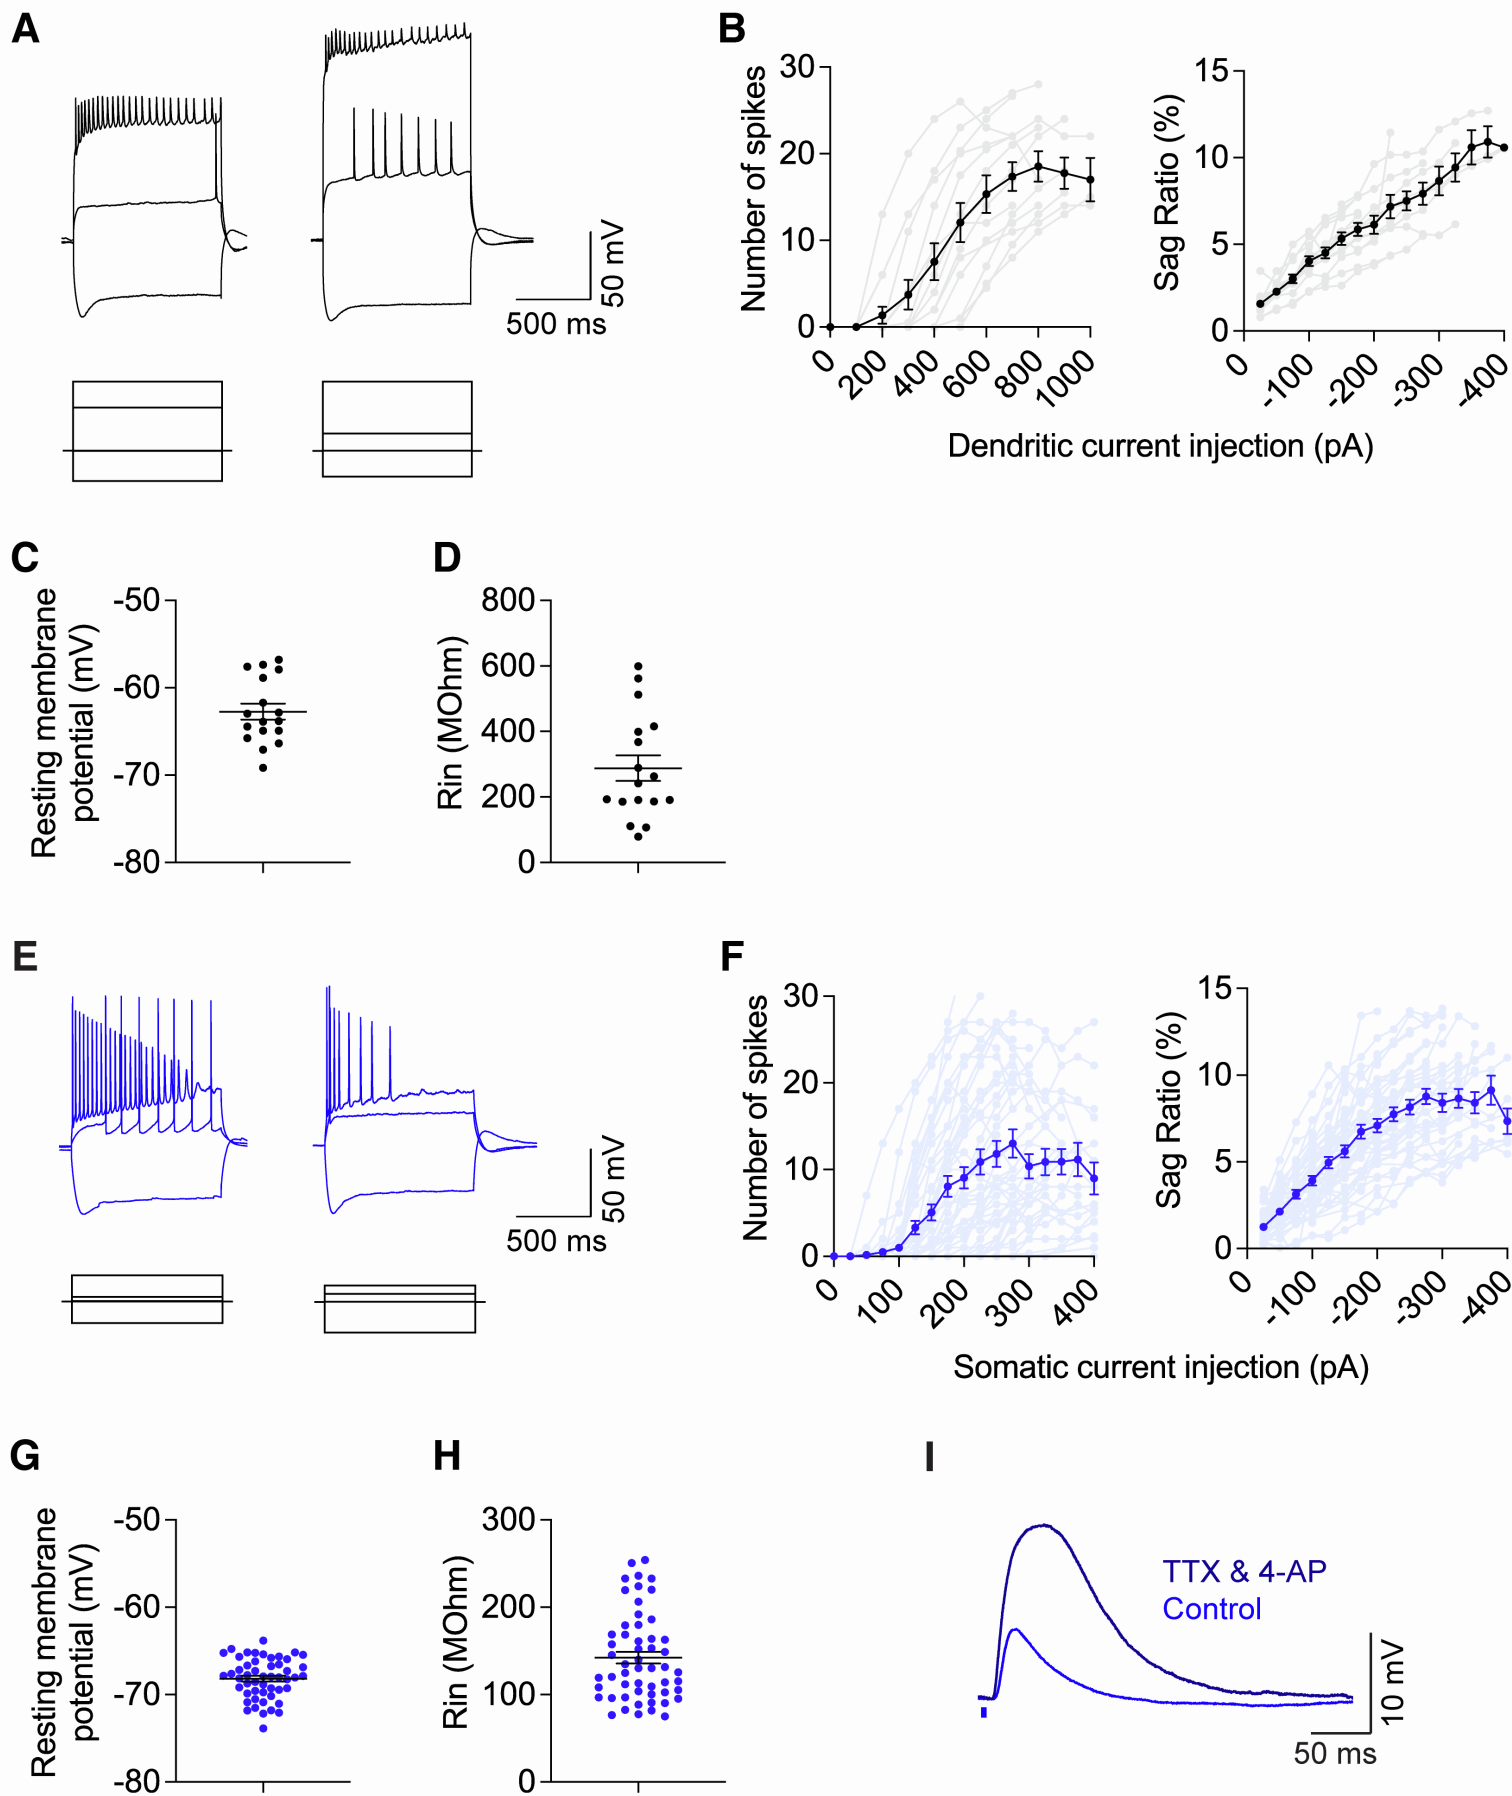

**Figure S2**

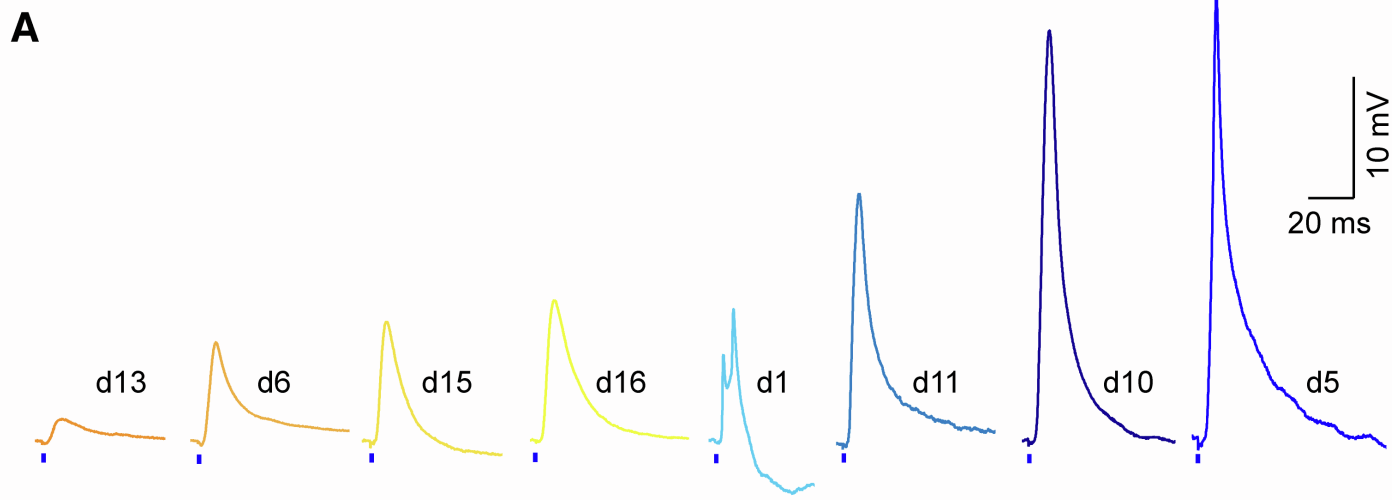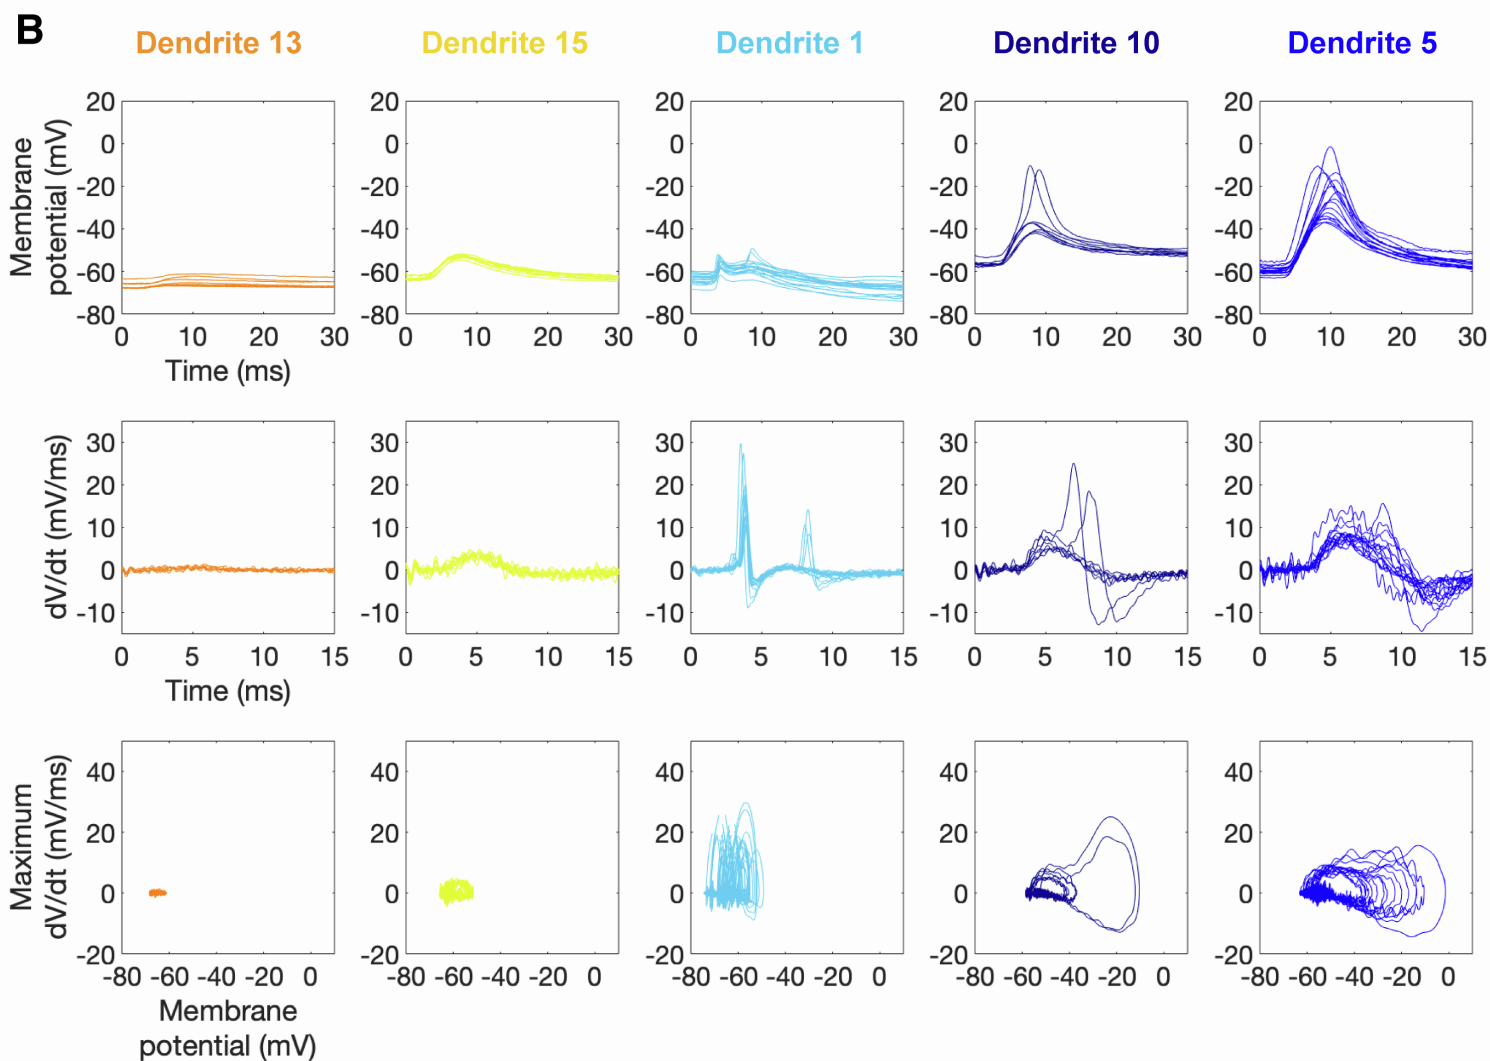

**Figure S3**

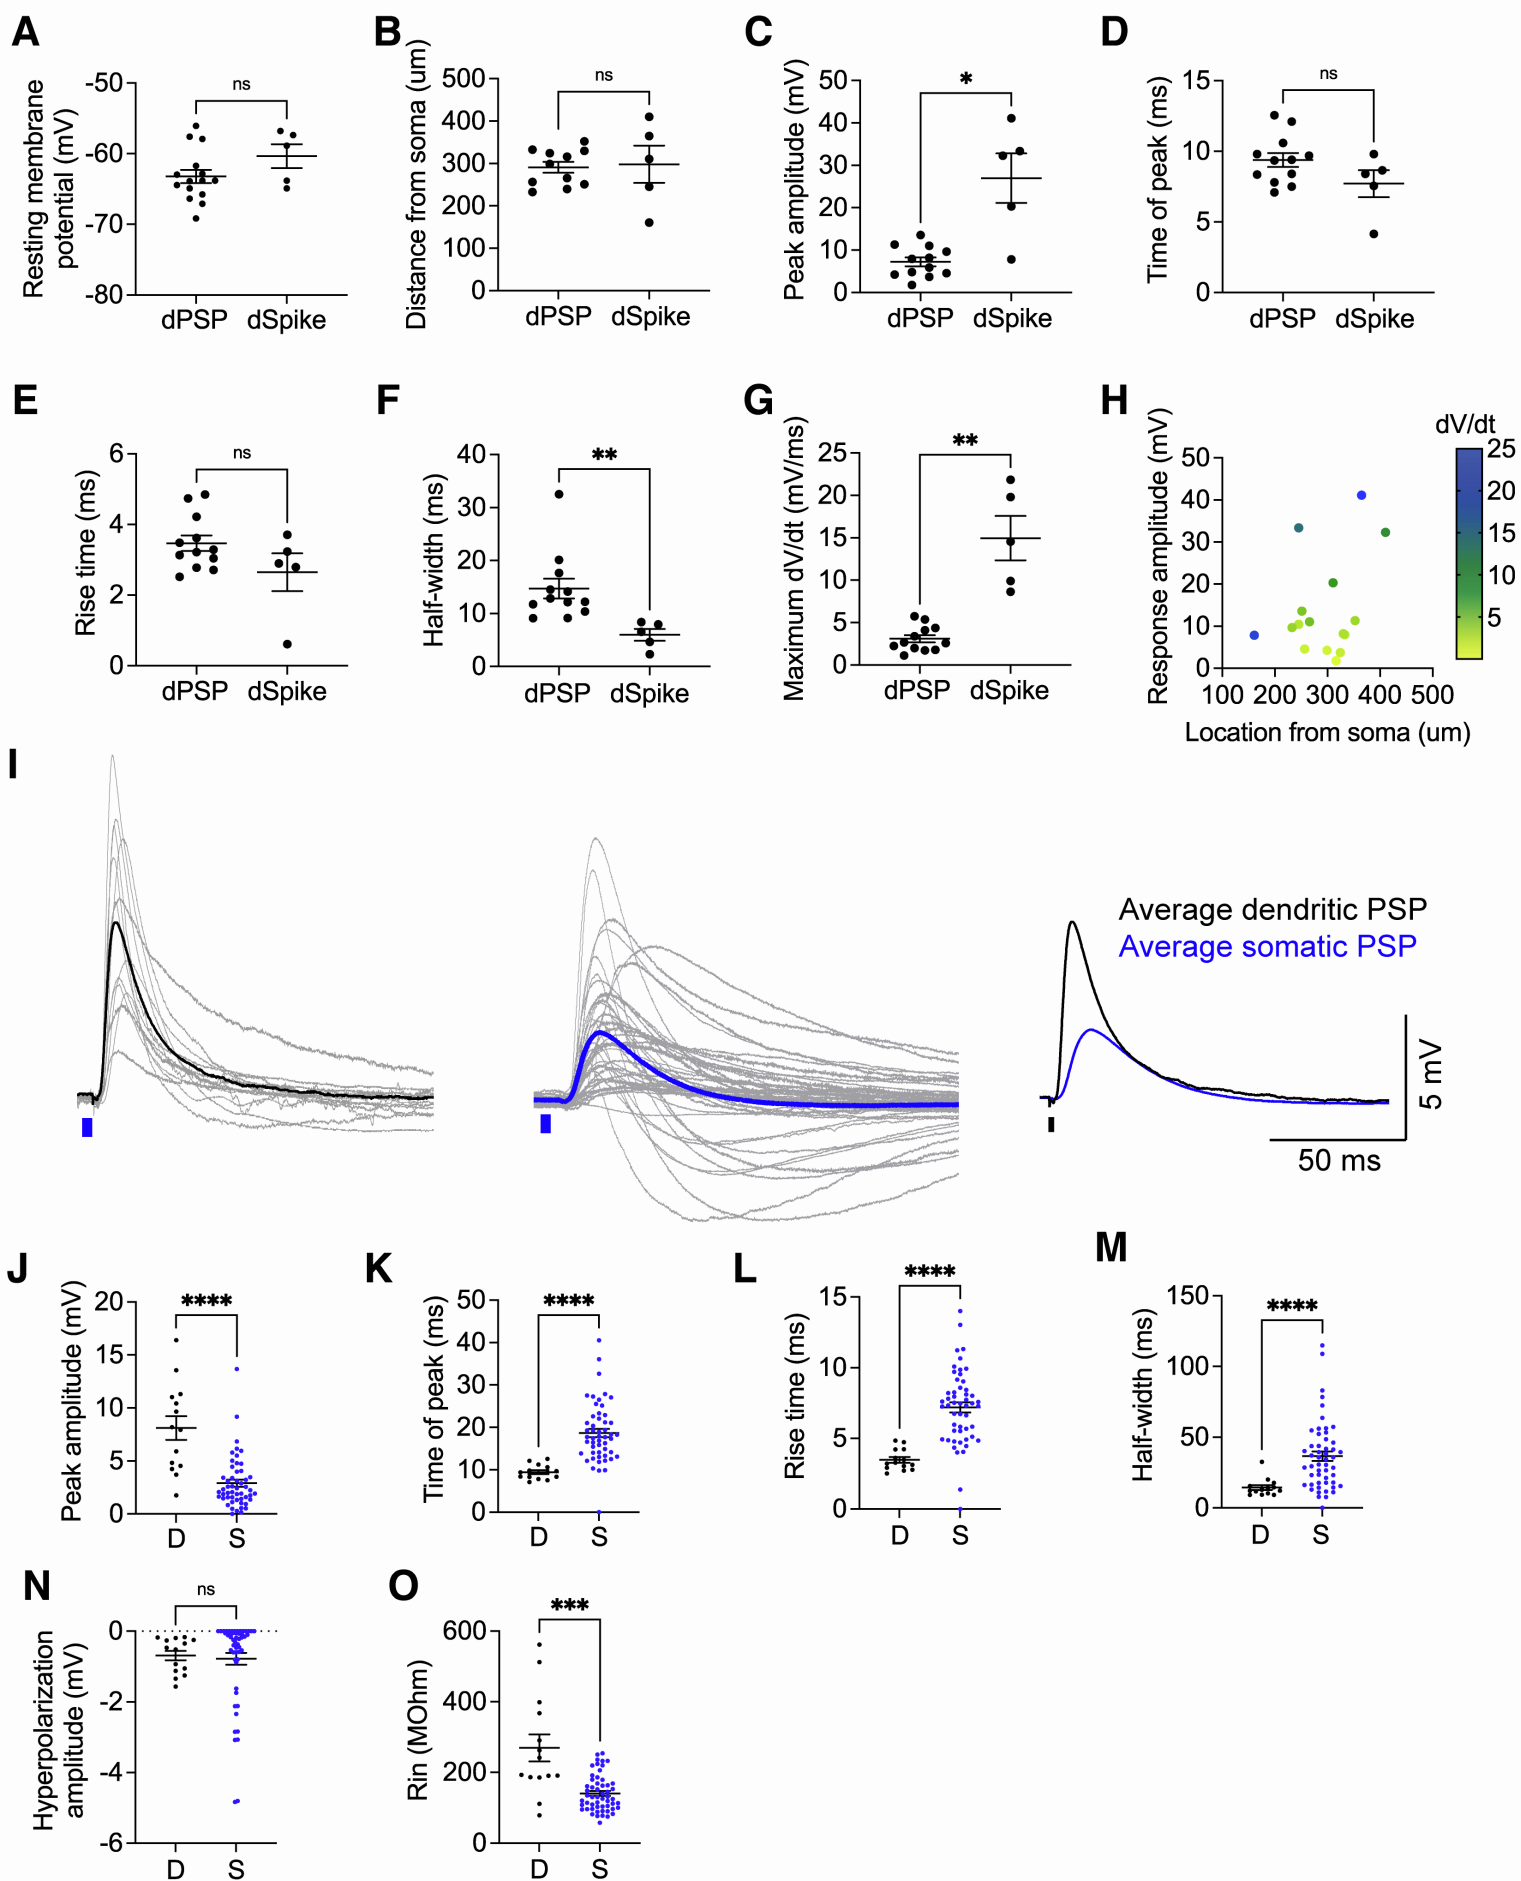

**Figure S4**

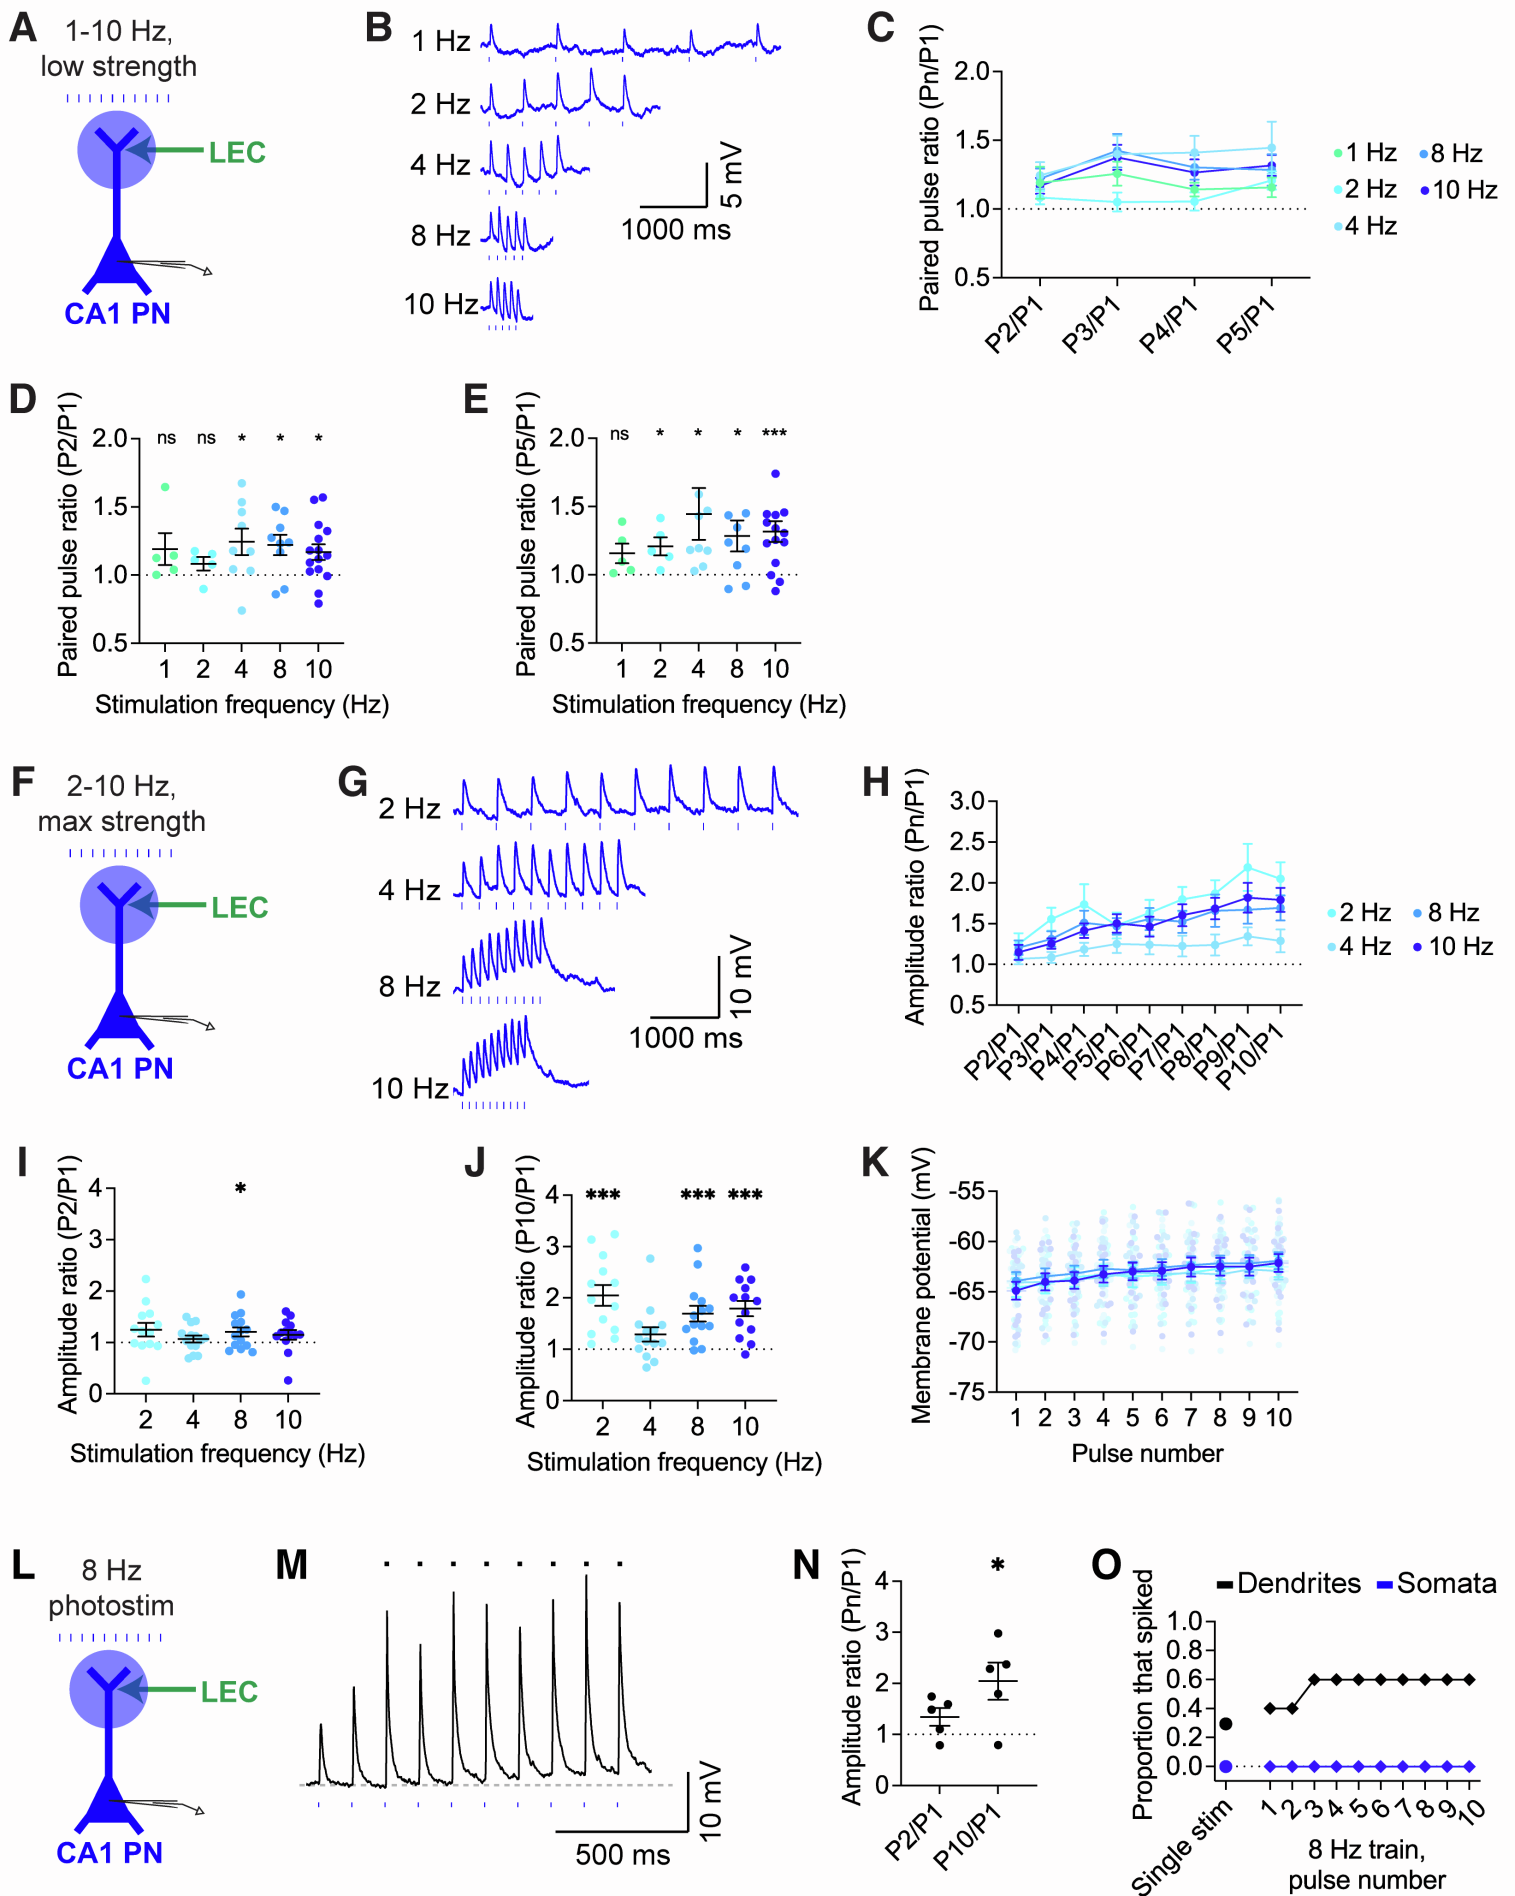

**Figure S5**

**A**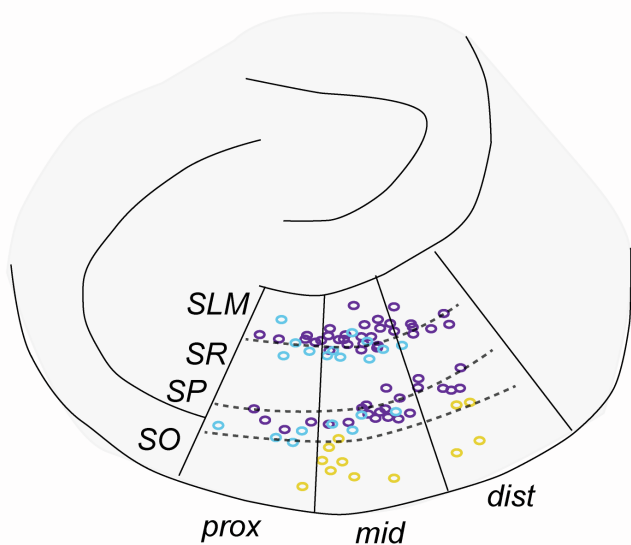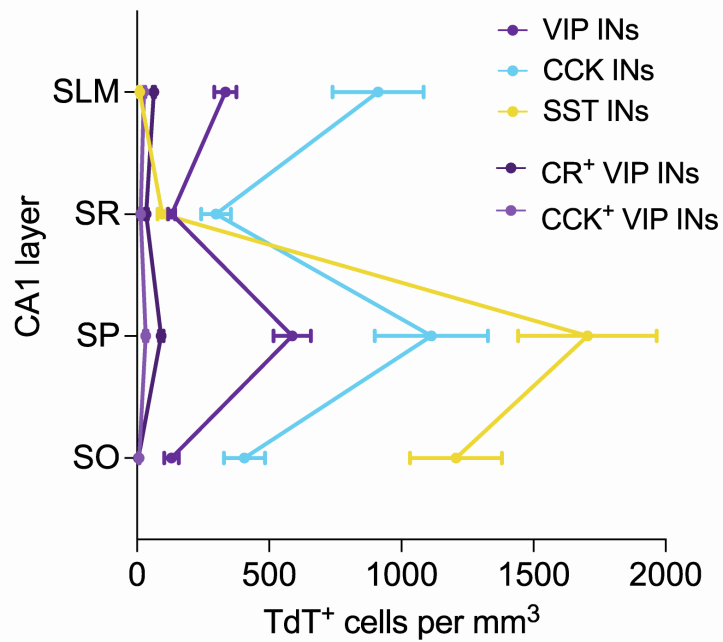**B**

INs responding to LEC inputs

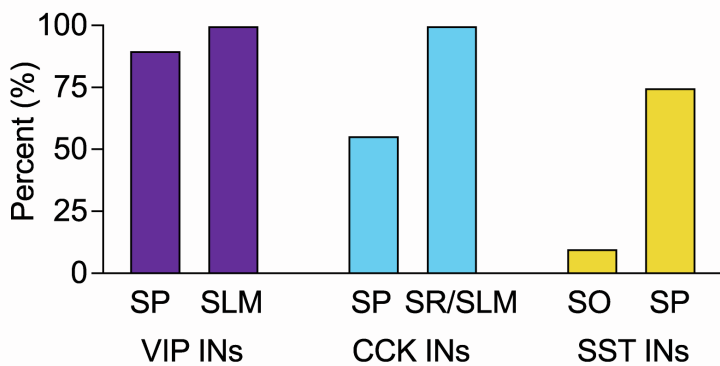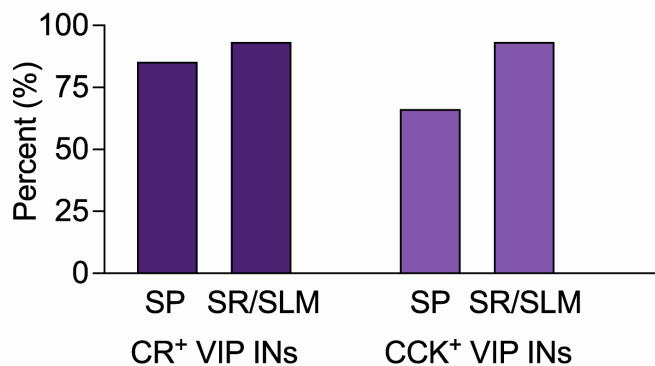**C**

INs driven to spike by LEC inputs

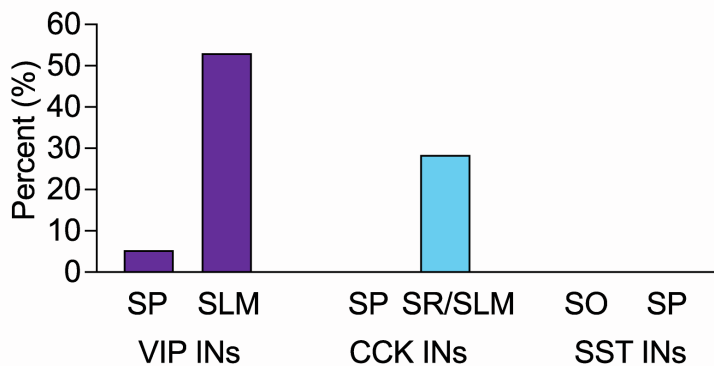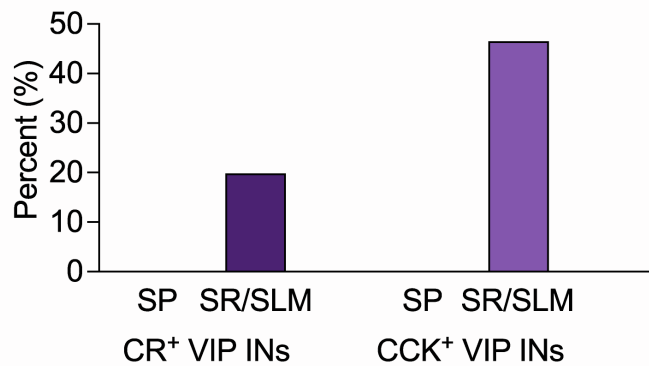**Figure S6**

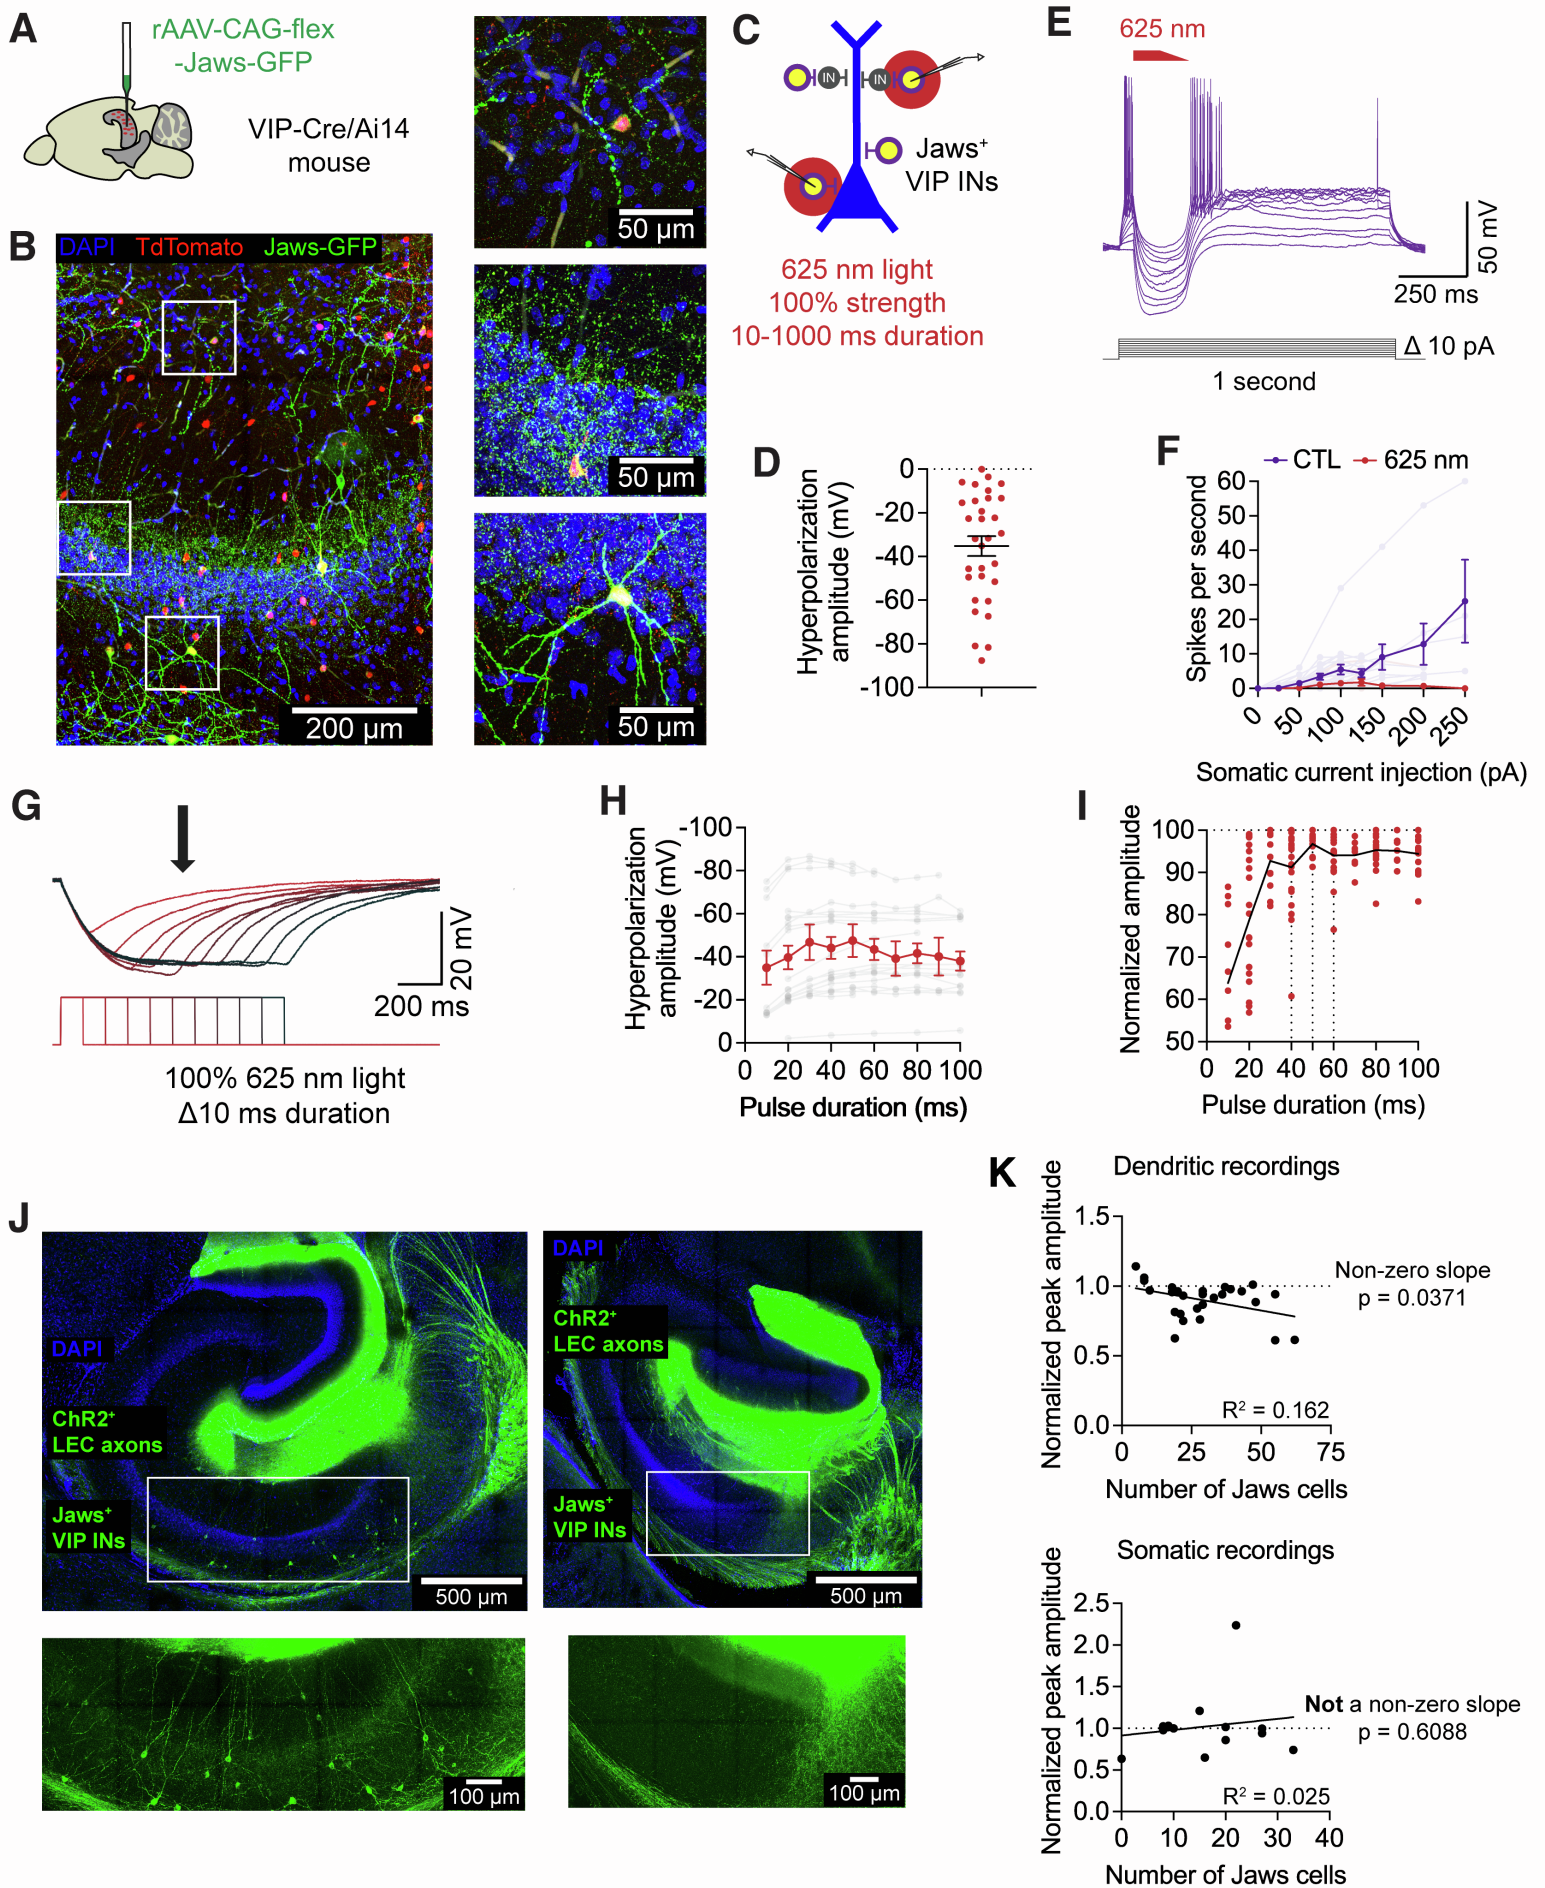

**Figure S7**



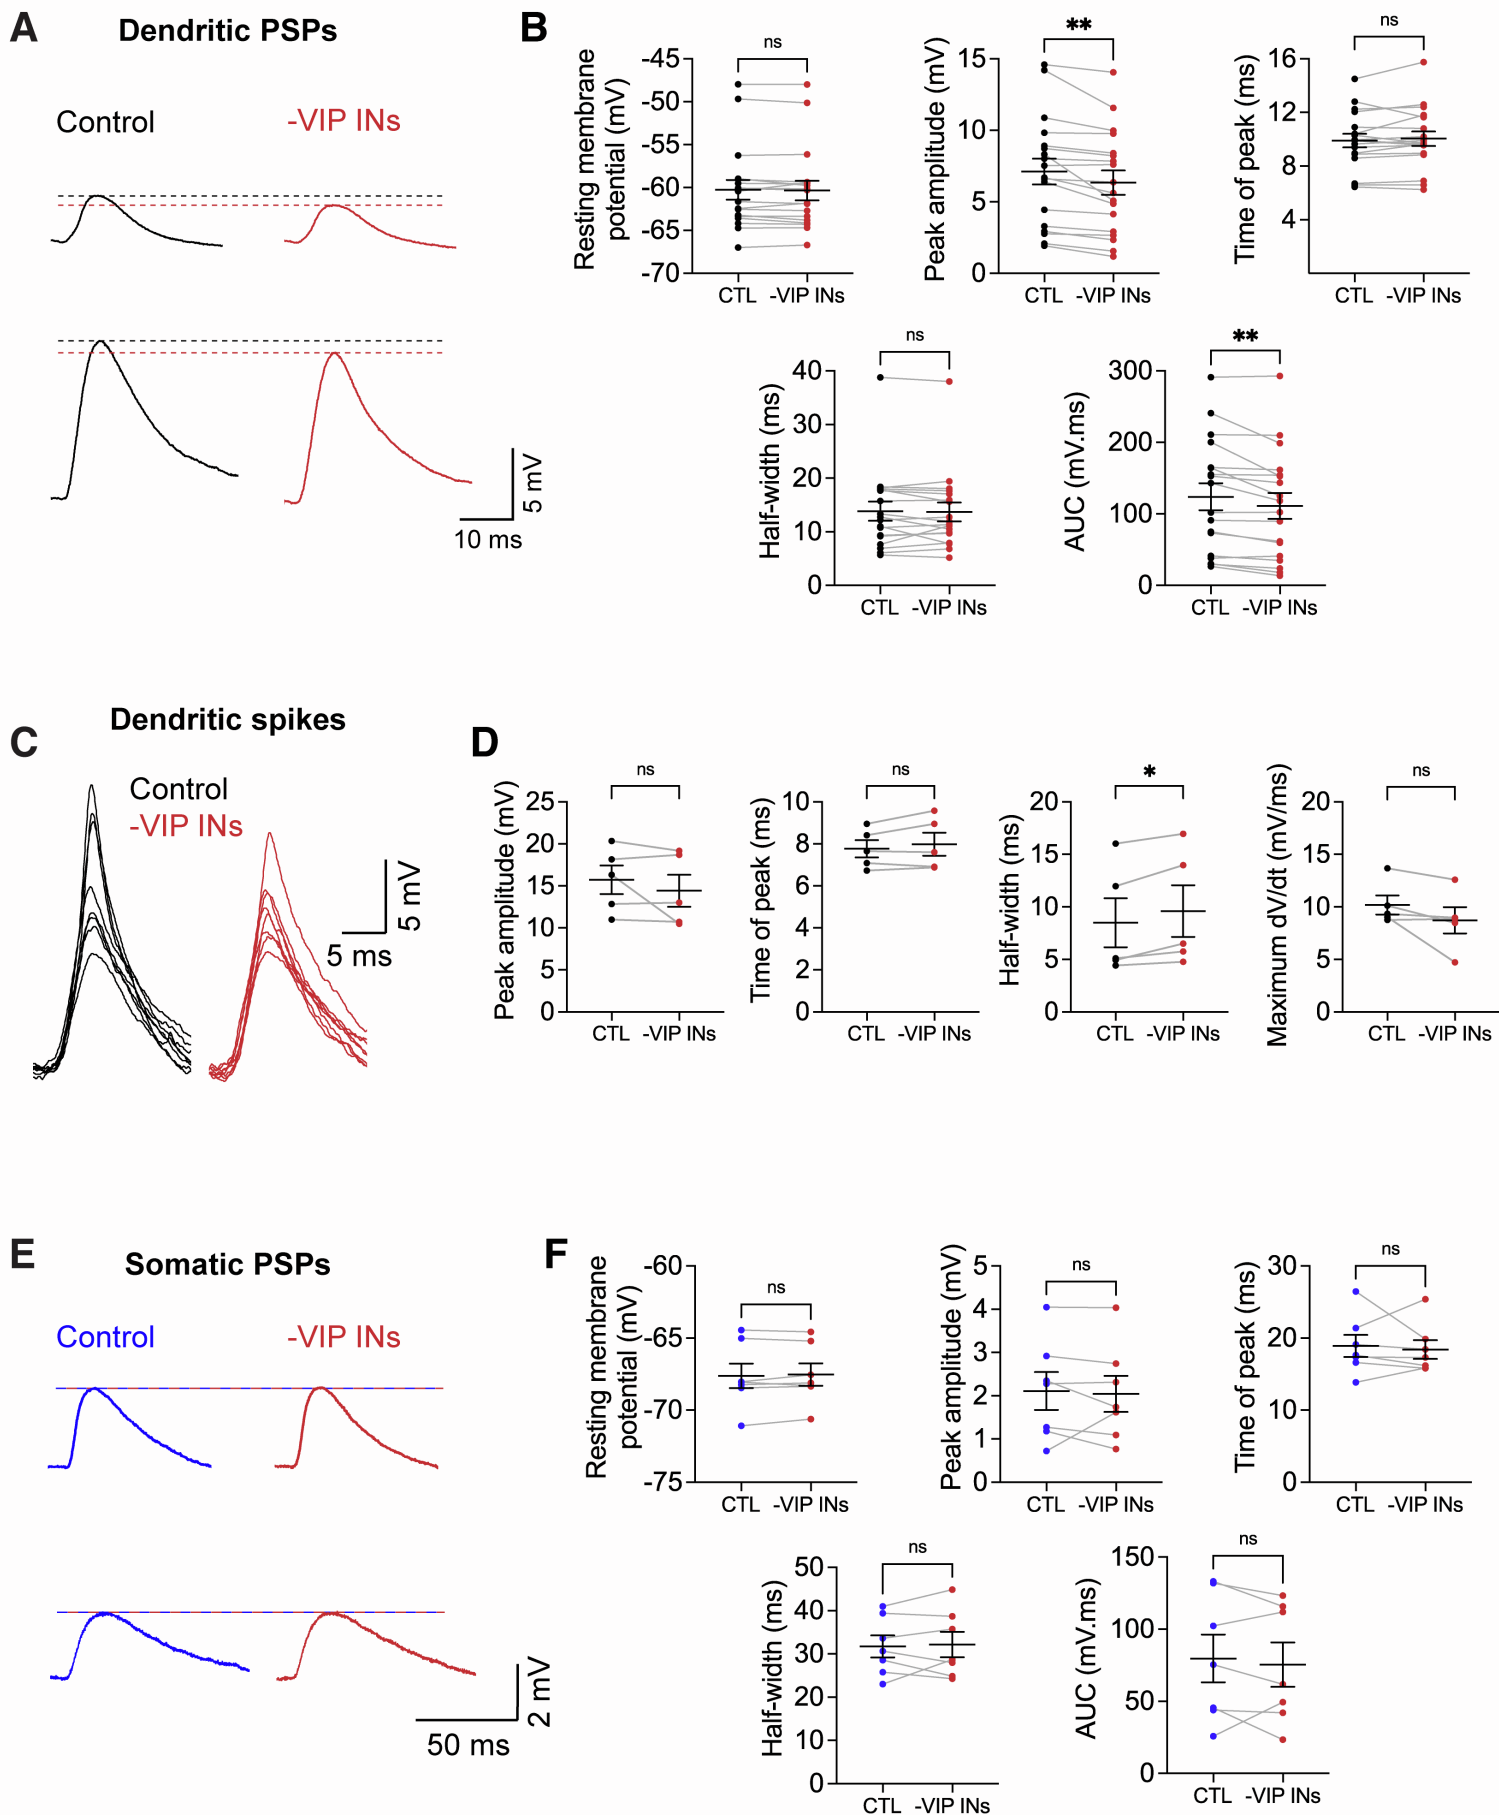

**Figure S8**

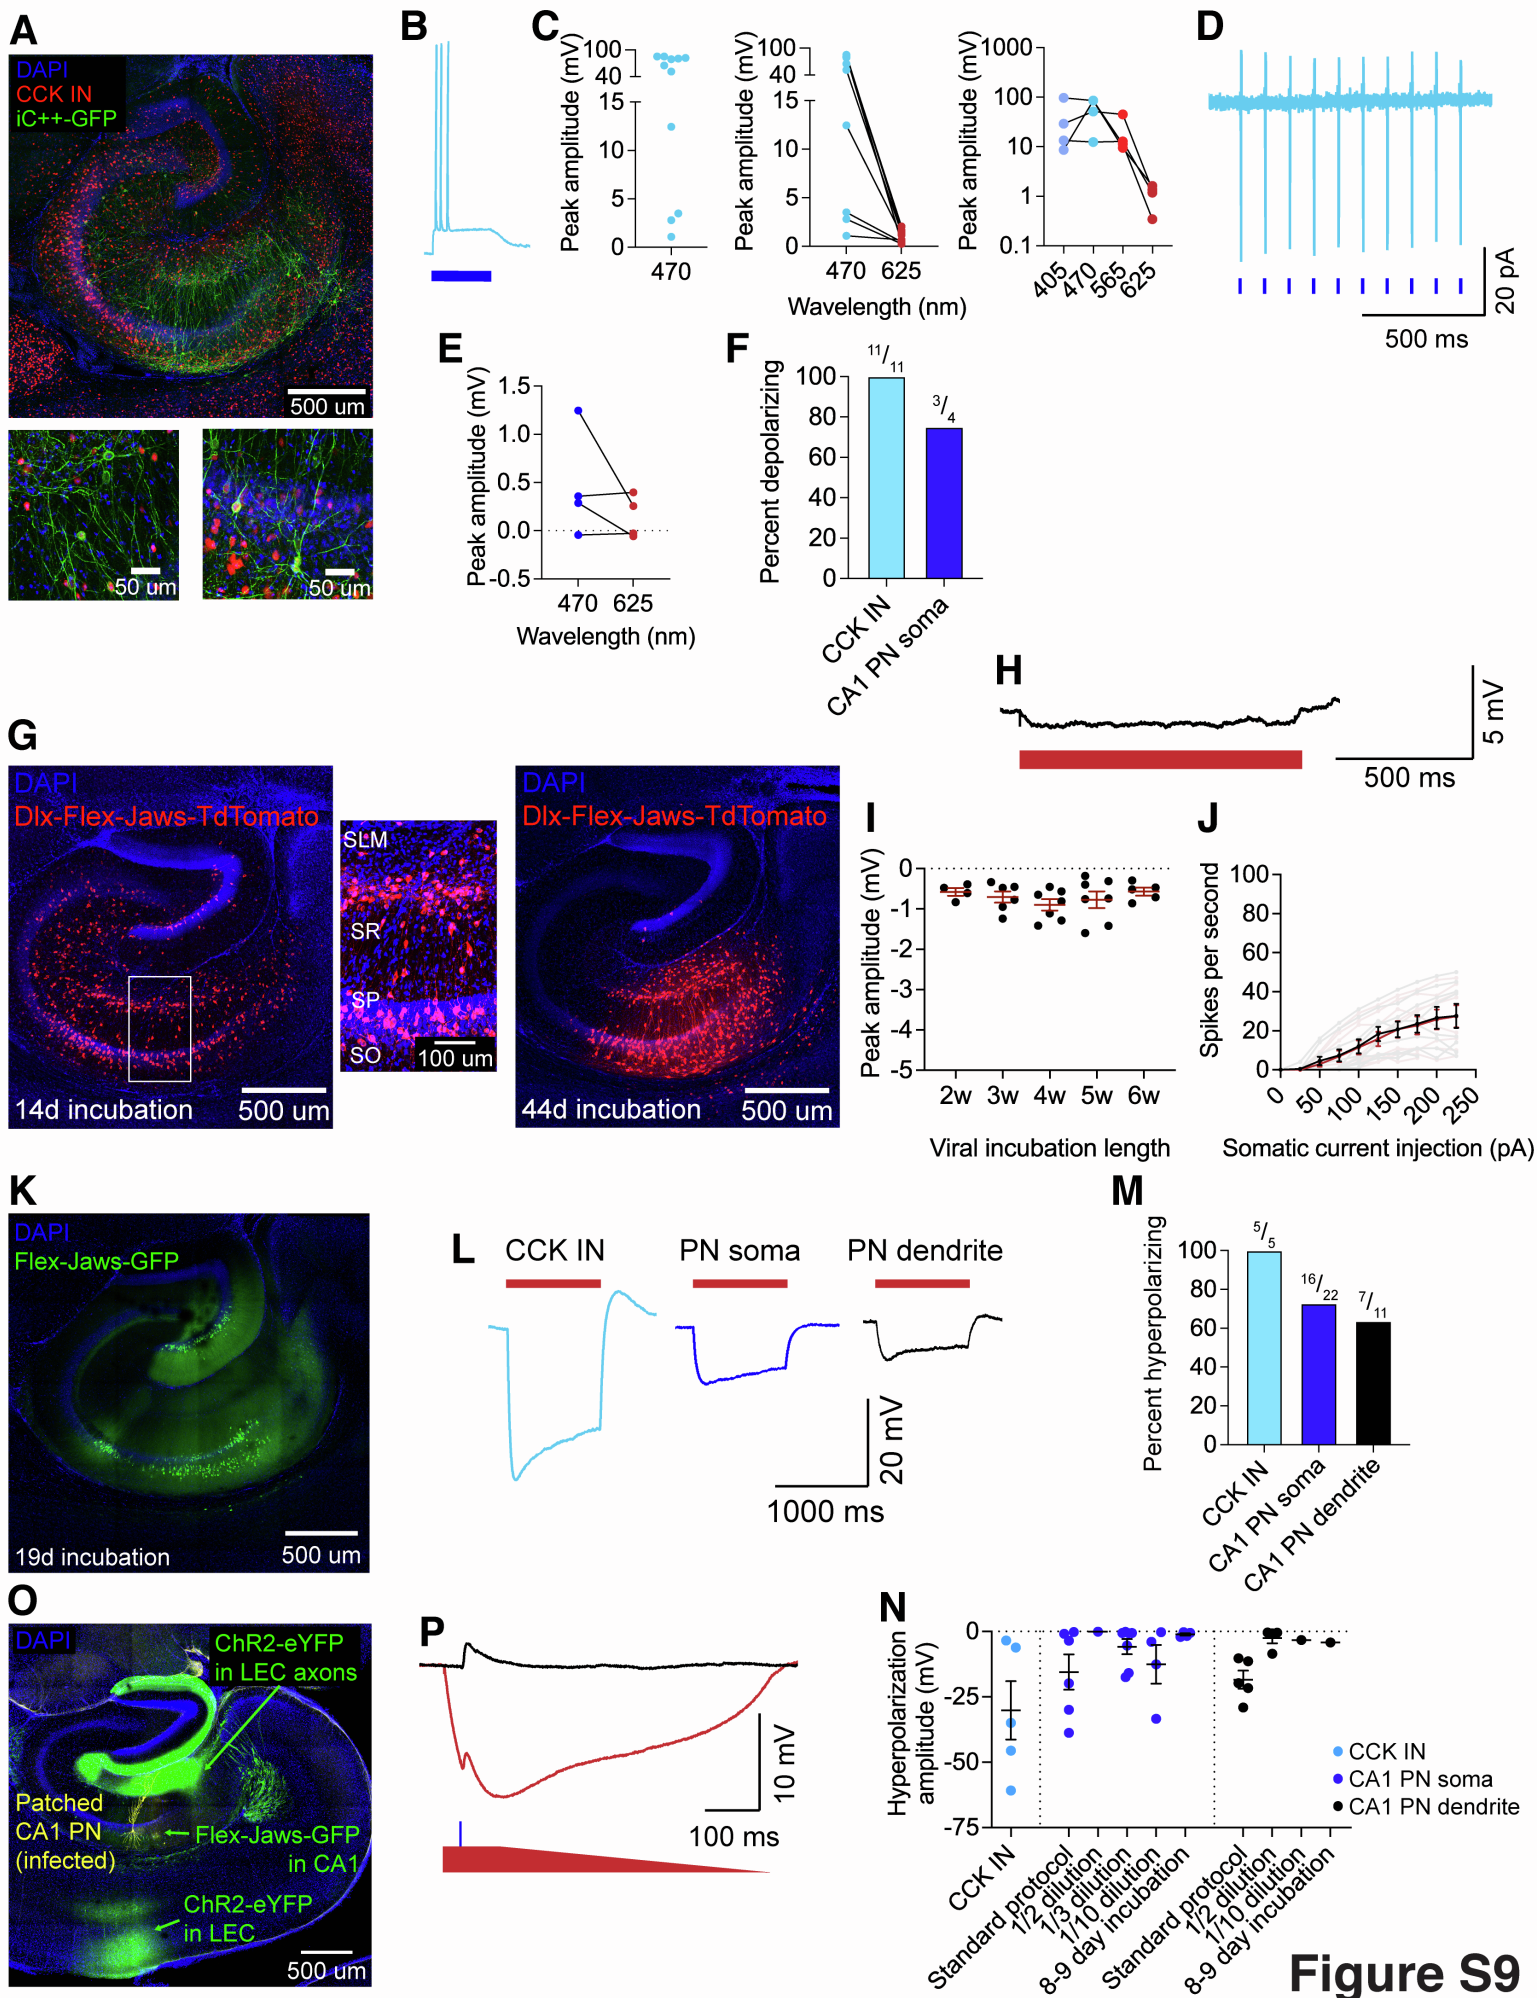

**Figure S9**

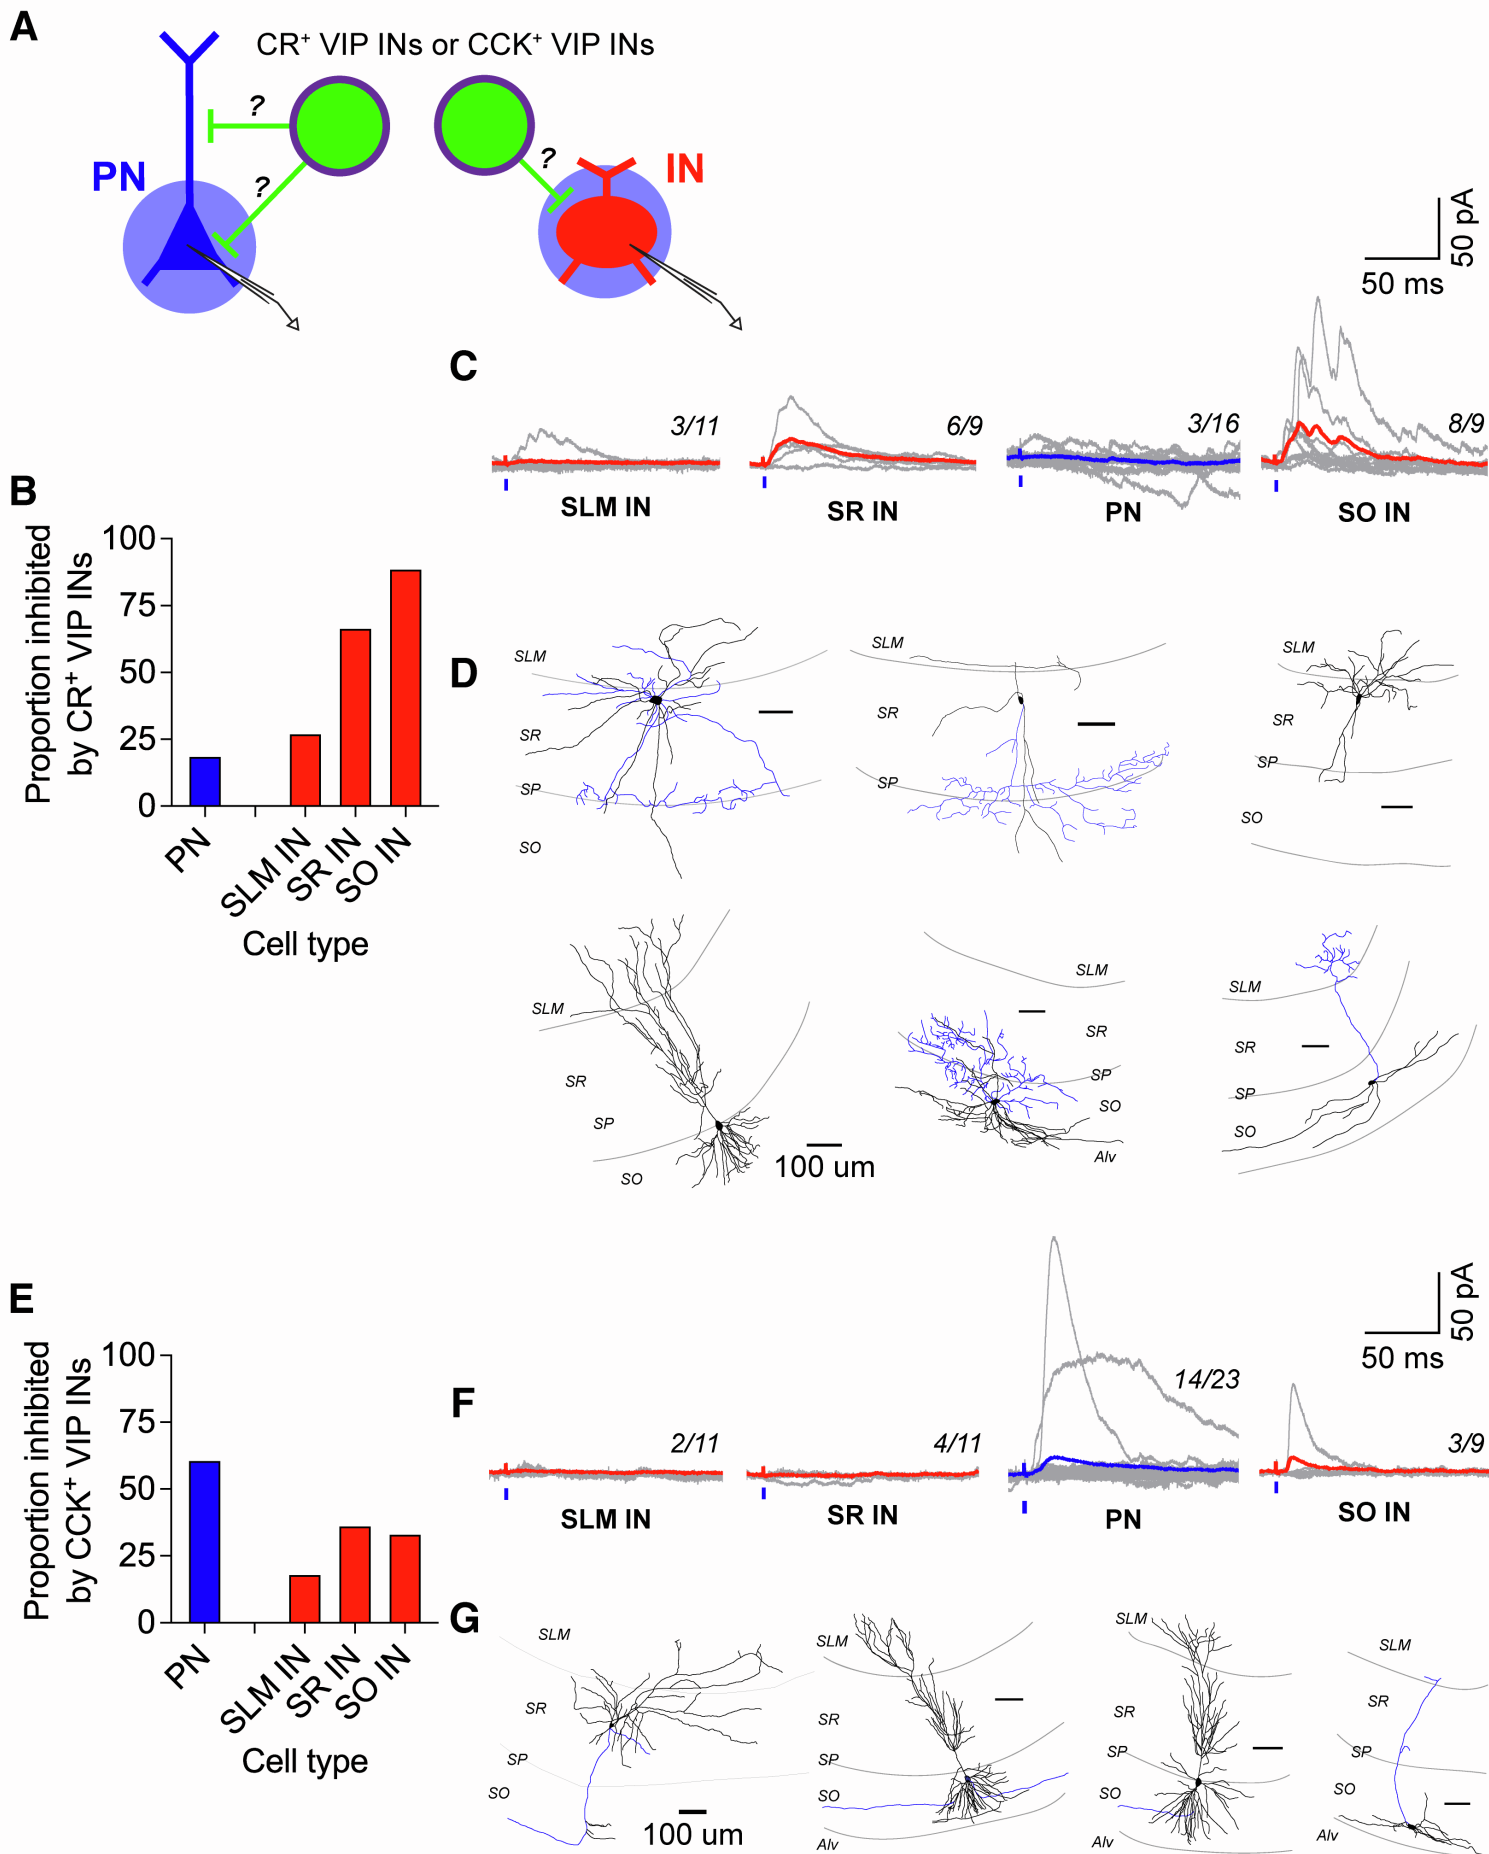

**Figure S10**

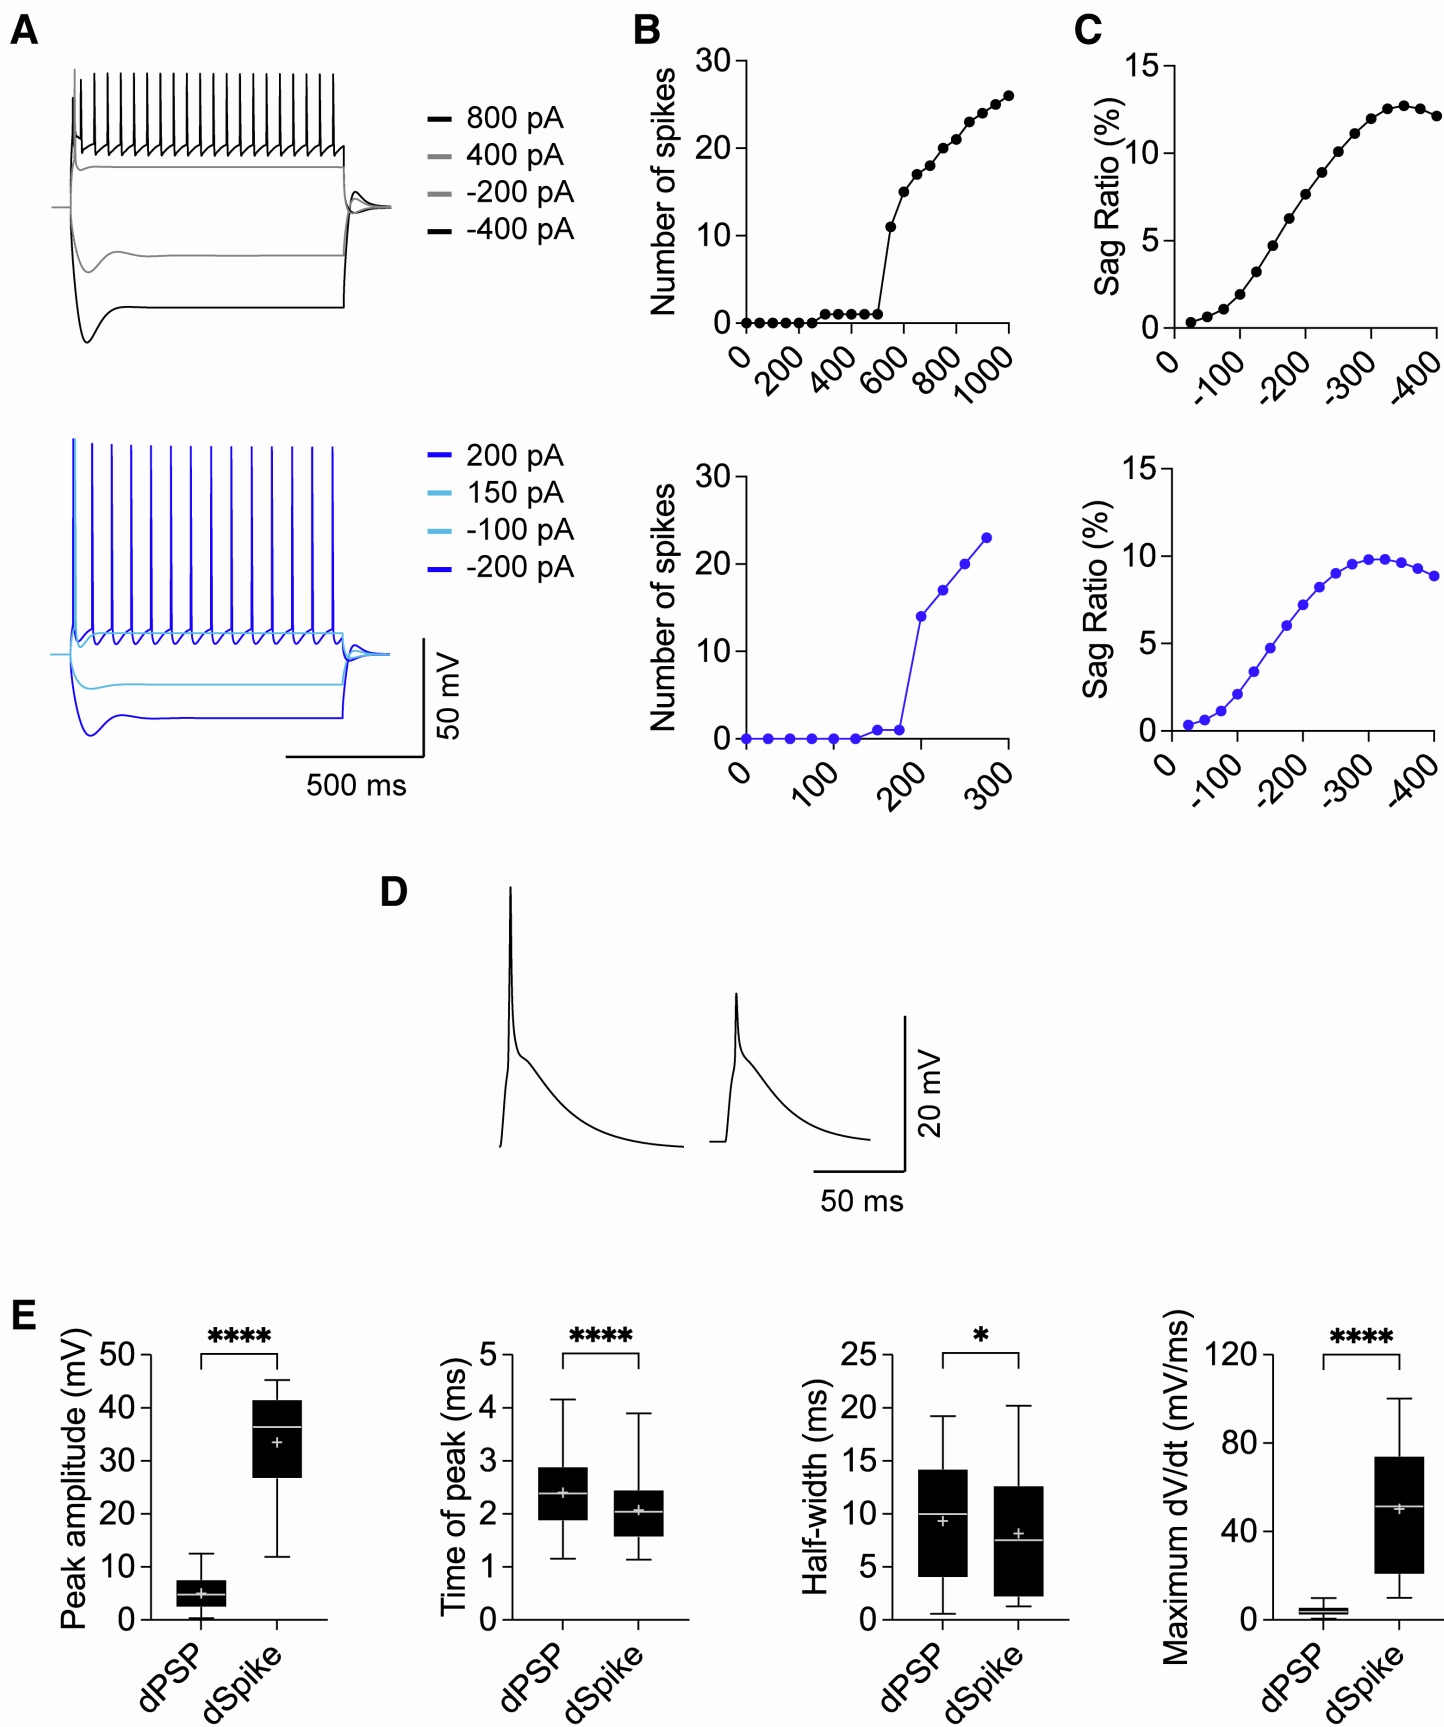

Figure S11

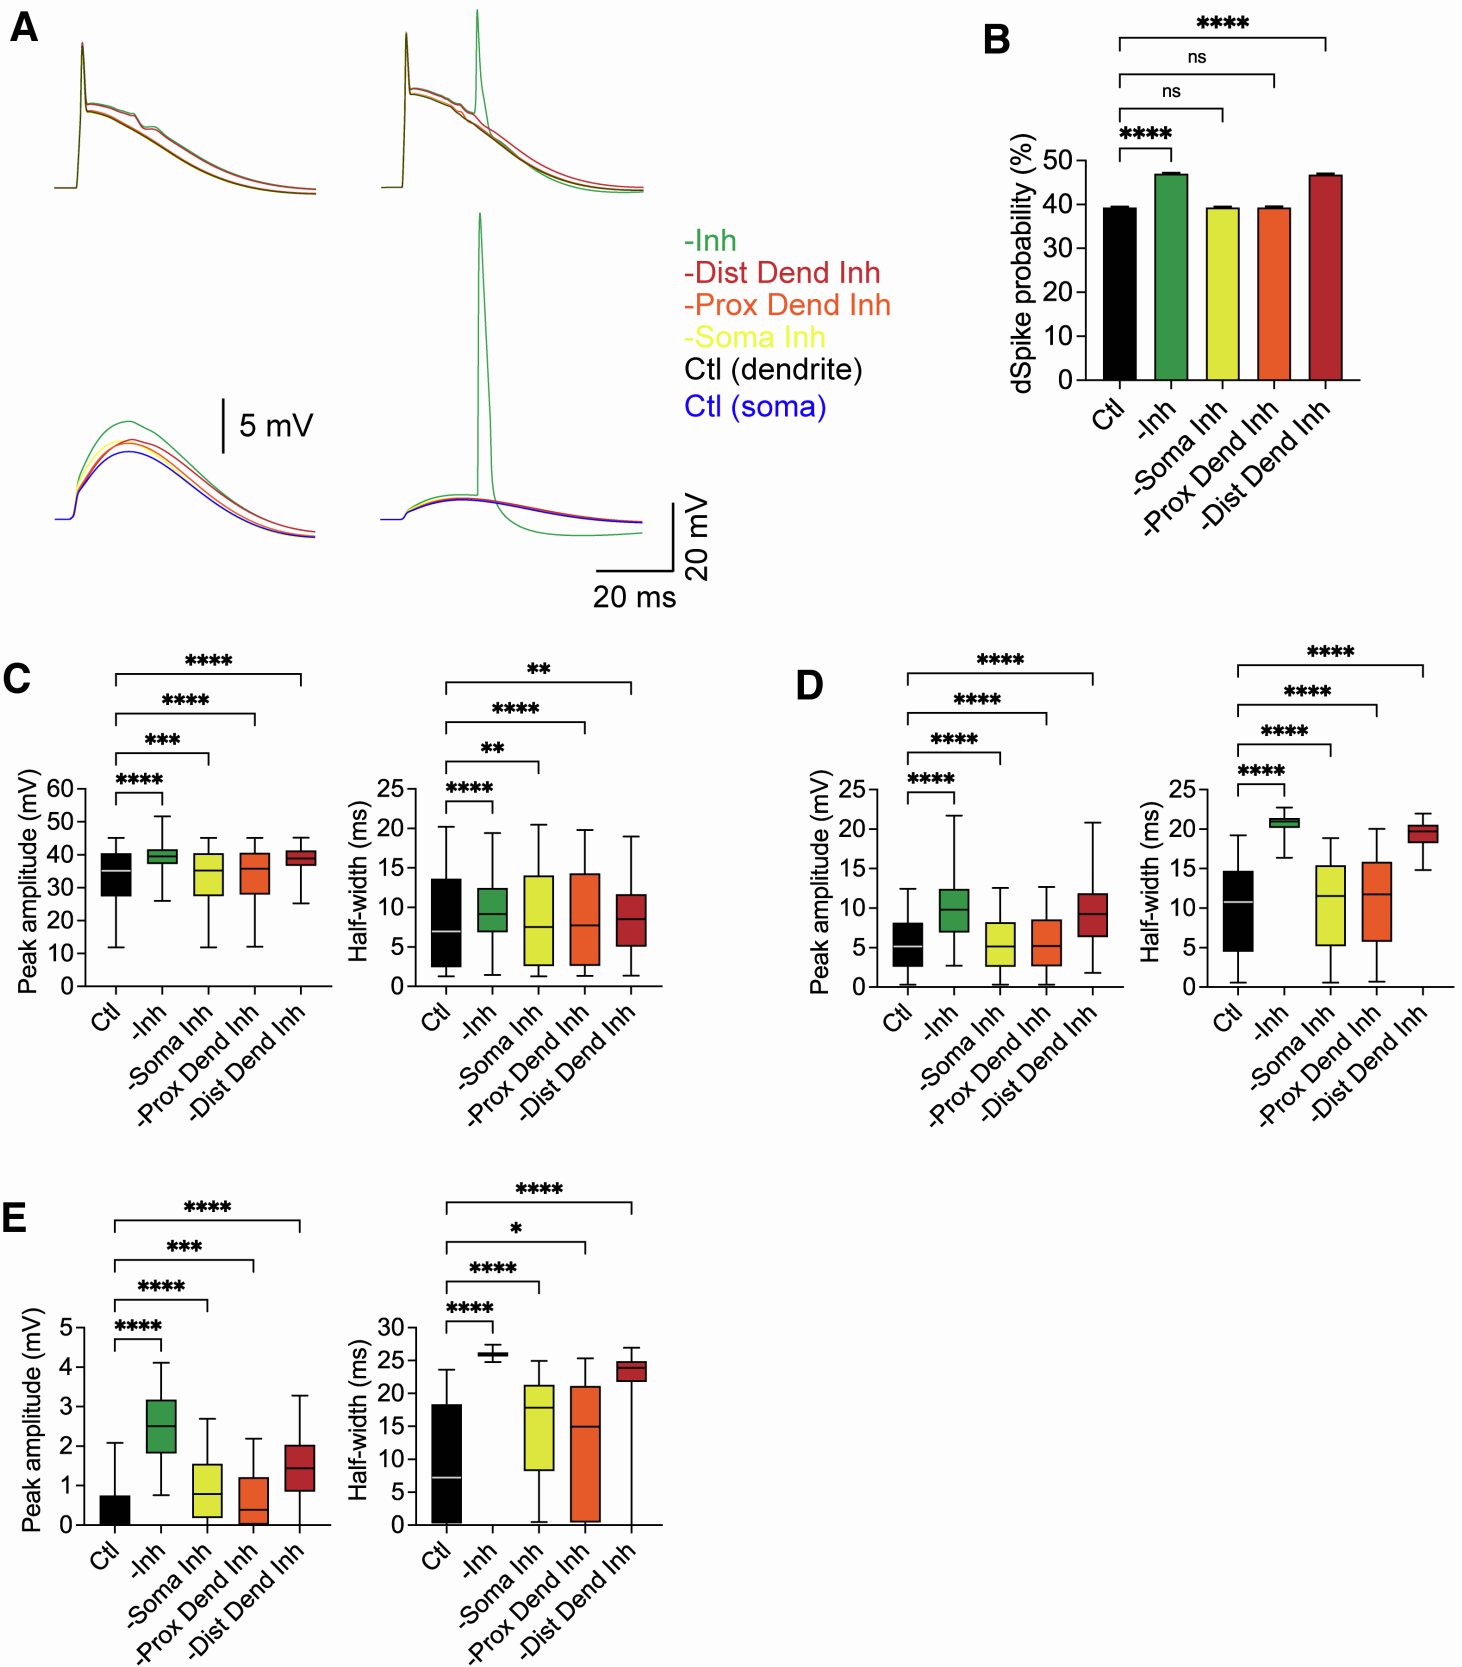

Figure S12

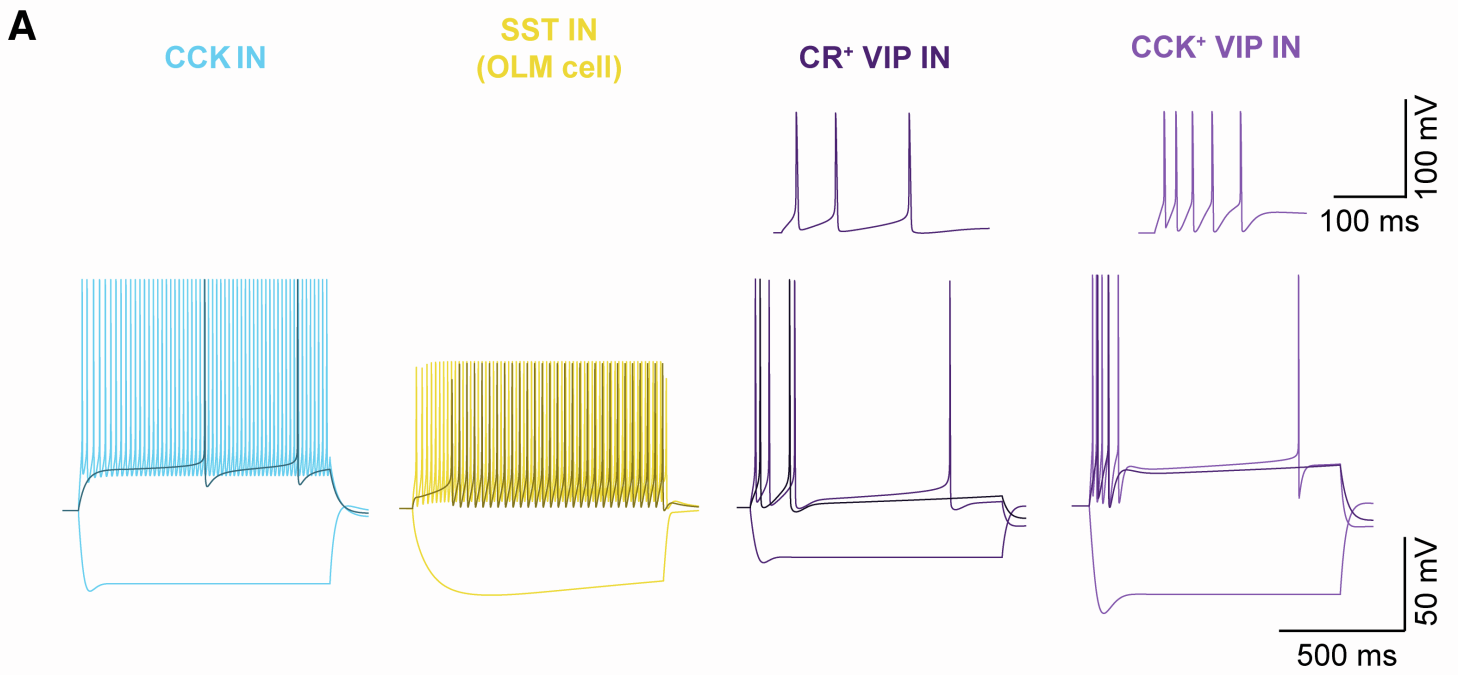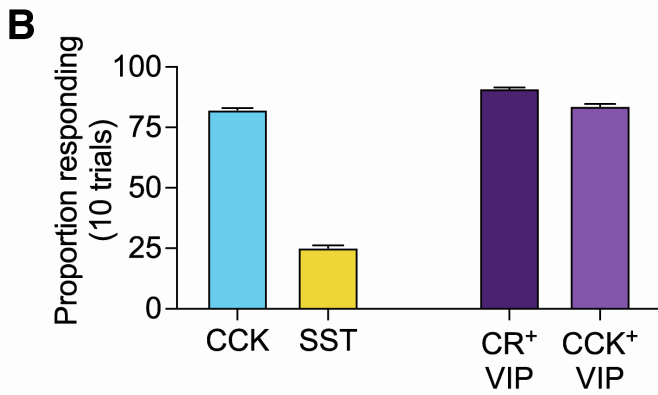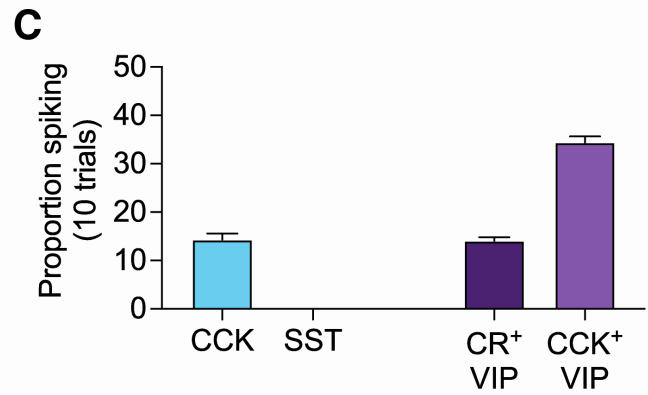

**Figure S13**

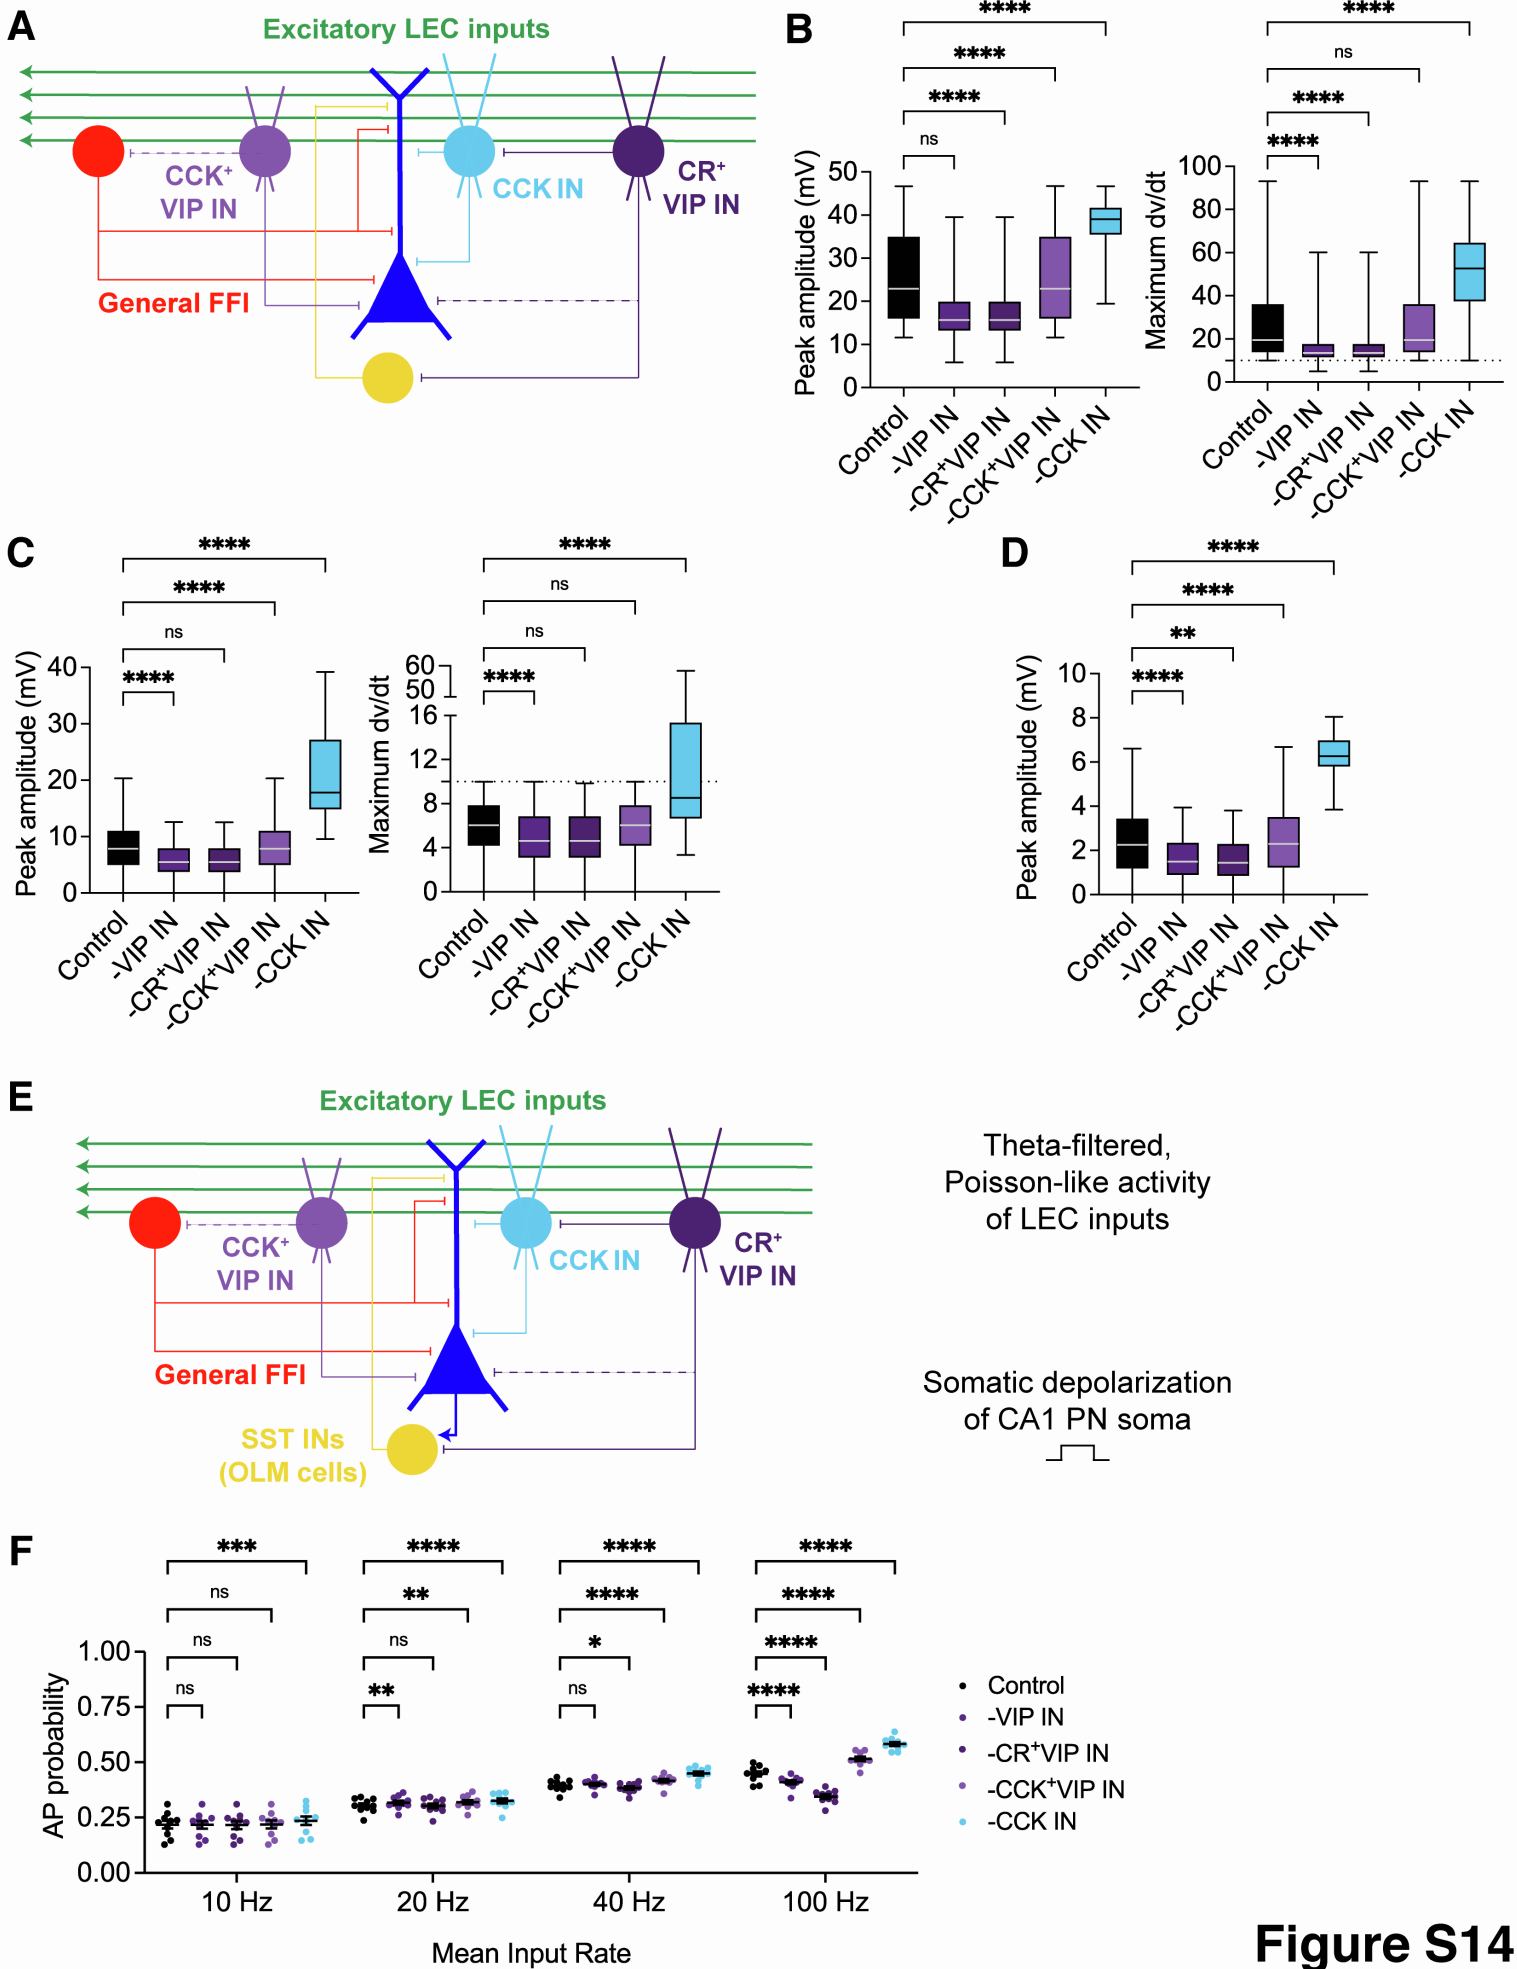

**Figure S14**

| Name of compartment | SR/SLM CCK IN                 |           | OLM IN                        |          | CCK <sup>+</sup> VIP IN       |           | CR <sup>+</sup> VIP IN        |           |
|---------------------|-------------------------------|-----------|-------------------------------|----------|-------------------------------|-----------|-------------------------------|-----------|
|                     | d x L ( $\mu\text{m}^2$ ) / # |           | d x L ( $\mu\text{m}^2$ ) / # |          | d x L ( $\mu\text{m}^2$ ) / # |           | d x L ( $\mu\text{m}^2$ ) / # |           |
|                     | compartments                  |           | compartments                  |          | compartments                  |           | compartments                  |           |
| soma                | 10 x 20                       | 1         | 10 x 25                       | 1        | 10 x 20                       | 1         | 10 x 20                       | 1         |
| radProx             | 4.0 x 100                     | 2         | -                             | -        | 4.0 x 50                      | 2         | 4.0 x 100                     | 2         |
| radMed              | 3.0 x 100                     | 2         | -                             | -        | 3.0 x 50                      | 2         | 3.0 x 100                     | 2         |
| radDist             | 2.0 x 200                     | 2         | -                             | -        | 2.0 x 100                     | 2         | 2.0 x 200                     | 2         |
| lmM                 | 1.5 x 100                     | 2         | -                             | -        | 1.5 x 50                      | 2         | 1.5 x 100                     | 2         |
| Lmt                 | 1.0 x 100                     | 2         | -                             | -        | 1.0 x 50                      | 2         | 1.0 x 100                     | 2         |
| oriProx             | 2.0 x 100                     | 2         | -                             | -        | 2.0 x 50                      | 2         | 2.0 x 100                     | 2         |
| oriMed              | 1.5 x 100                     | 2         | -                             | -        | 1.5 x 50                      | 2         | 1.5 x 100                     | 2         |
| oriDist             | 1.0 x 100                     | 2         | -                             | -        | 1.0 x 50                      | 2         | 1.0 x 100                     | 2         |
| dend                | -                             | -         | 3.0x250                       | 2        | -                             | -         | -                             | -         |
| axon                | -                             | -         | 1.5x150                       | 1        | -                             | -         | -                             | -         |
| <b>Total</b>        |                               | <b>17</b> |                               | <b>4</b> |                               | <b>17</b> |                               | <b>17</b> |

**Table S1**



| Name of compartment | CA1 PN                                     |           |
|---------------------|--------------------------------------------|-----------|
|                     | d x L ( $\mu\text{m}^2$ ) / # compartments |           |
| soma                | 10.0 x 10                                  | 1         |
| axon                | 1.0 x 150                                  | 1         |
| radTProx            | 3.0 x 80                                   | 2         |
| radTMed             | 2.5 x 70                                   | 2         |
| radTdist1           | 2.0 x 50                                   | 1         |
| radTdist2           | 1.75 x 50                                  | 1         |
| radTdist3           | 1.5 x 50                                   | 1         |
| lm_thick            | 0.95 x 50                                  | 2         |
| lm_medium           | 0.9 x 50                                   | 2         |
| lm_thin             | 0.6 x 75                                   | 4         |
| rad_thick           | 1.9 x 50                                   | 2         |
| rad_medium          | 1.5 x 50                                   | 2         |
| rad_thin            | 0.95 x 75                                  | 4         |
| oriprox             | 1.6 x 75                                   | 2         |
| oridist             | 1.1 x 75                                   | 4         |
| <b>Total</b>        |                                            | <b>29</b> |

**Table S2**

| Mechanism                                                                        | Compartment |         |          |         |          |         |         |
|----------------------------------------------------------------------------------|-------------|---------|----------|---------|----------|---------|---------|
|                                                                                  | Soma        | Axon    | radTprox | radTmed | radTdist |         |         |
|                                                                                  |             |         |          |         | 1        | 2       | 3       |
| Leak conductance [S/cm <sup>2</sup> ]                                            | 5e-8        | 5e-8    | 5.26e-8  | 6.67e-8 |          | 2.85e-7 |         |
| Na <sup>+</sup> conductance [S/cm <sup>2</sup> ]                                 | 3.5e-2      | 1.5e0   | 1.4e-2   | 1.4e-2  |          | 1.4e-2  |         |
| Delayed rectifier K <sup>+</sup> conductance [S/cm <sup>2</sup> ]                | 1.4e-3      | 1e-1    | 1.74e-3  | 1.73e-3 |          | 1.73e-3 |         |
| Proximal A-type K <sup>+</sup> conductance [S/cm <sup>2</sup> ]                  | 7.5e-3      | x       | 1.8e-3   | x       |          | x       |         |
| Distal A-type K <sup>+</sup> conductance [S/cm <sup>2</sup> ]                    | x           | x       | x        | 2.78e-2 | 3.75e-2  | 4.73e-2 | 4.86e-2 |
| M-type K <sup>+</sup> conductance [S/cm <sup>2</sup> ]                           | 1.66e-2     | 3e-6    | 6e-4     | 6e-4    |          | 6e-4    |         |
| I <sub>h</sub> conductance [S/cm <sup>2</sup> ]                                  | 1.5e-5      | x       | 1.8e-5   | 6e-5    |          | 9e-5    |         |
| L-type Ca <sup>2+</sup> conductance [S/cm <sup>2</sup> ]                         | 7e-3        | x       | 3.16e-6  | 6.32e-6 | 1.27e-5  | 1.9e-5  | 2.53e-5 |
| R-type Ca <sup>2+</sup> conductance [S/cm <sup>2</sup> ]                         | 3e-3        | x       | 3e-4     | 3e-4    |          | 3e-4    |         |
| T-type Ca <sup>2+</sup> conductance [S/cm <sup>2</sup> ]                         | 5e-5        | x       | 4e-4     | 4e-4    |          | 4e-4    |         |
| Ca <sup>2+</sup> -dependent mAHP K <sup>+</sup> conductance [S/cm <sup>2</sup> ] | 9.075e-2    | x       | 6.6e-3   | 6.6e-3  |          | 4.12e-3 |         |
| Ca <sup>2+</sup> -dependent sAHP K <sup>+</sup> conductance [S/cm <sup>2</sup> ] | 5e-4        | x       | 5e-4     | 5e-4    |          | 5e-5    |         |
| Membrane capacitance c <sub>m</sub> [μF/cm <sup>2</sup> ]                        | 1           | 1       | 2.2      | 2.2     |          | 2.2     |         |
| Membrane resistance R <sub>m</sub> [Ohm cm <sup>2</sup> ]                        | 200,000     | 200,000 | 190,000  | 150,000 |          | 35,000  |         |
| Axial resistance R <sub>a</sub> [Ohm cm]                                         | 300         | 300     | 285      | 270     | 255      | 225     | 216     |
| V <sub>half,h</sub> [mV]                                                         | -90         | x       | -90      | -90     |          | -90     |         |
| E <sub>L</sub> [mV]                                                              | -70         | -70     | -70      | -70     |          | -70     |         |
| E <sub>Na</sub> [mV]                                                             | 50          | 50      | 50       | 50      |          | 50      |         |
| E <sub>K</sub> [mV]                                                              | -80         | -80     | -80      | -80     |          | -80     |         |
| E <sub>h</sub> [mV]                                                              | -10         | x       | -10      | -10     |          | -10     |         |
| E <sub>Ca</sub> [mV]                                                             | 140         | x       | 140      | 140     |          | 140     |         |

**Table S3**

| Mechanism                                                                        | Compartment     |         |             |                   |          |        |
|----------------------------------------------------------------------------------|-----------------|---------|-------------|-------------------|----------|--------|
|                                                                                  | Basal dendrites |         | Apical tuft | Oblique dendrites |          |        |
|                                                                                  | prox            | distal  |             | thick             | med      | thin   |
| Leak conductance [S/cm <sup>2</sup> ]                                            | 5.55e-7         |         | 8.3e-7      | 7.7e-7            | 8.3e-7   | 8.3e-7 |
| Na <sup>+</sup> conductance [S/cm <sup>2</sup> ]                                 | 7e-3            |         | 1.5e-3      |                   | 8.4e-3   |        |
| Delayed rectifier K <sup>+</sup> conductance [S/cm <sup>2</sup> ]                | 8.6e-4          |         | 1.9e-4      |                   | 1e-3     |        |
| Proximal A-type K <sup>+</sup> conductance [S/cm <sup>2</sup> ]                  | 7.5e-3          |         | x           |                   | x        |        |
| Distal A-type K <sup>+</sup> conductance [S/cm <sup>2</sup> ]                    | x               |         | 4.86e-2     |                   | 4.17e-2  |        |
| M-type K <sup>+</sup> conductance [S/cm <sup>2</sup> ]                           | 6e-4            |         | 1.2e-3      |                   | 1.2e-3   |        |
| I <sub>h</sub> conductance [S/cm <sup>2</sup> ]                                  | 1.5e-5          | 2.25e-5 | 1.2e-4      |                   | 6e-5     |        |
| L-type Ca <sup>2+</sup> conductance [S/cm <sup>2</sup> ]                         | x               |         | 3.16e-6     |                   | 1.26e-5  |        |
| R-type Ca <sup>2+</sup> conductance [S/cm <sup>2</sup> ]                         | x               |         | x           |                   | x        |        |
| T-type Ca <sup>2+</sup> conductance [S/cm <sup>2</sup> ]                         | x               |         | x           |                   | x        |        |
| Ca <sup>2+</sup> -dependent mAHP K <sup>+</sup> conductance [S/cm <sup>2</sup> ] | 1.65e-2         |         | 4.125e-3    |                   | 4.125e-3 |        |
| Ca <sup>2+</sup> -dependent sAHP K <sup>+</sup> conductance [S/cm <sup>2</sup> ] | 5e-4            |         | 5e-5        |                   | 5e-5     |        |
| Membrane capacitance c <sub>m</sub> [μF/cm <sup>2</sup> ]                        | 3.0             |         | 3.0         |                   | 3.0      |        |
| Membrane resistance R <sub>m</sub> [Ohm cm <sup>2</sup> ]                        | 18,000          |         | 12,000      | 13,000            | 12,000   | 12,000 |
| Axial resistance R <sub>a</sub> [Ohm cm]                                         | 150             |         | 150         |                   | 150      |        |
| V <sub>half,h</sub> [mV]                                                         | -81             |         | -90         |                   | -90      |        |
| E <sub>L</sub> [mV]                                                              | -70             |         | -70         |                   | -70      |        |
| E <sub>Na</sub> [mV]                                                             | 50              |         | 50          |                   | 50       |        |
| E <sub>K</sub> [mV]                                                              | -80             |         | -80         |                   | -80      |        |
| E <sub>h</sub> [mV]                                                              | -10             |         | -10         |                   | -10      |        |
| E <sub>Ca</sub> [mV]                                                             | 140             |         | 140         |                   | 140      |        |

**Table S4**

| Mechanism                                                                        | Compartment |        |        |          |                         |                        |           |
|----------------------------------------------------------------------------------|-------------|--------|--------|----------|-------------------------|------------------------|-----------|
|                                                                                  | SR/SLM      | OLM IN |        |          | CCK <sup>+</sup> VIP IN | CR <sup>+</sup> VIP IN |           |
|                                                                                  | CCK IN      | Soma   | Axon   | Dendrite |                         | Soma                   | Dendrites |
| Leak conductance [S/cm <sup>2</sup> ]                                            | 3.7e-5      | 5e-5   | 2.5e-5 | 2.5e-5   | 1.8e-5                  | 3.1e-5                 | 3.1e-5    |
| Na <sup>+</sup> conductance [S/cm <sup>2</sup> ]                                 | 2e-1        | 2.6e-2 | 3.4e-2 | 4.7e-2   | 3.4e0                   | 3.0e-2                 | 9e-2      |
| Delayed rectifier K <sup>+</sup> conductance [S/cm <sup>2</sup> ]                | 1.3e-2      | 4.8e-2 | 5.1e-2 | 4.6e-1   | 2.6e-1                  | 3.6e-3                 | 9e-3      |
| A-type K <sup>+</sup> conductance [S/cm <sup>2</sup> ]                           | 6e-4        | 1.2e-2 | x      | 7.2e-2   | 1.5e-4                  | x                      | x         |
| Slowly inactivating K <sup>+</sup> conductance [S/cm <sup>2</sup> ]              | x           | x      | x      | x        | x                       | 6.5e-3                 | x         |
| I <sub>h</sub> conductance [S/cm <sup>2</sup> ]                                  | 2.5e-5      | 1.4e-5 | x      | 1.4e-5   | 2.7e-5                  | 2.0e-4                 | 2.7e-5    |
| L-type Ca <sup>2+</sup> conductance [S/cm <sup>2</sup> ]                         | 2.5e-5      | x      | x      | x        | 7.5e-4                  | 3.0e-4                 | x         |
| N-type Ca <sup>2+</sup> conductance [S/cm <sup>2</sup> ]                         | 1.6e-6      | x      | x      | x        | 1.2e-4                  | 1.0e-3                 | x         |
| Ca <sup>2+</sup> -dependent mAHP K <sup>+</sup> conductance [S/cm <sup>2</sup> ] | 7.2e-2      | x      | x      | x        | 2e-3                    | 4.5e-4                 | x         |
| Ca <sup>2+</sup> -dependent sAHP K <sup>+</sup> conductance [S/cm <sup>2</sup> ] | 4e-4        | x      | x      | x        | 4e-2                    | 4.0e-3                 | x         |
| Membrane capacitance c <sub>m</sub> [μF/cm <sup>2</sup> ]                        | 1.1         |        | 1.6    |          | 1.3                     |                        | 1.4       |
| Axial resistance R <sub>a</sub> [Ohm cm]                                         | 100         |        | 150    |          | 100                     |                        | 150       |
| E <sub>L</sub> [mV]                                                              | -70         | -67    | -67    | -65      | -65                     |                        | -65       |
| E <sub>h</sub> [mV]                                                              | -40         |        | -32.9  |          | -40                     | -40                    | -32.9     |
| E <sub>Na</sub> [mV]                                                             | 55          |        | 50     |          | 55                      |                        | 55        |
| E <sub>K</sub> [mV]                                                              | -85         |        | -77    |          | -85                     |                        | -85       |
| E <sub>Ca</sub> [mV]                                                             | 130         |        | x      |          | 130                     | 130                    | x         |
| τ <sub>Ca</sub> [ms]                                                             | 9           |        | x      |          | 70                      | 20                     | x         |

**Table S5**

| <b>From/to</b>                     | <b>CA1 PNs</b>    |                   | <b>SR/SLM<br/>CCK INs</b> | <b>OLM INs</b>    | <b>CCK<sup>+</sup> VIP<br/>INs</b> | <b>CR<sup>+</sup> VIP<br/>INs</b> |
|------------------------------------|-------------------|-------------------|---------------------------|-------------------|------------------------------------|-----------------------------------|
| <b>LEC LIII</b>                    | AMPA              | NMDA              | AMPA                      | AMPA              | AMPA                               | AMPA                              |
| g (nS)                             | 1.5e-3            | 3.7e-4            | 1.8e-3                    | 1.3e-3            | 7.7e-4                             | 1.2e-3                            |
| $\tau_r$ (ms)                      | 1.0               | 2.3               | 0.5                       | 0.5               | 0.5                                | 0.5                               |
| $\tau_d$ (ms)                      | 10.0              | 100.0             | 3.0                       | 8.0               | 3.0                                | 3.0                               |
| <b>CA1 PNs</b>                     | AMPA              |                   | AMPA                      | AMPA              | AMPA                               | AMPA                              |
| g (nS)                             | x                 |                   | x                         | 2.5e-3            | x                                  | x                                 |
| $\tau_r$ (ms)                      | x                 |                   | x                         | 0.5               | x                                  | x                                 |
| $\tau_d$ (ms)                      | x                 |                   | x                         | 8.0               | x                                  | x                                 |
| <b>SR/SLM<br/>CCK INs</b>          | GABA <sub>A</sub> | GABA <sub>B</sub> | GABA <sub>A</sub>         | GABA <sub>A</sub> | GABA <sub>A</sub>                  | GABA <sub>A</sub>                 |
| g (nS)                             | 1.5e-3            | 1.5e-3            | x                         | x                 | x                                  | x                                 |
| $\tau_r$ (ms)                      | 1.0               | 1.0               | x                         | x                 | x                                  | x                                 |
| $\tau_d$ (ms)                      | 11.0              | 50.0              | x                         | x                 | x                                  | x                                 |
| <b>OLM INs</b>                     | GABA <sub>A</sub> | GABA <sub>B</sub> | GABA <sub>A</sub>         | GABA <sub>A</sub> | GABA <sub>A</sub>                  | GABA <sub>A</sub>                 |
| g (nS)                             | 1.5e-3            | 1.5e-3            | x                         | x                 | x                                  | x                                 |
| $\tau_r$ (ms)                      | 1.0               | 1.0               | x                         | x                 | x                                  | x                                 |
| $\tau_d$ (ms)                      | 11.0              | 50.0              | x                         | x                 | x                                  | x                                 |
| <b>CCK<sup>+</sup> VIP<br/>INs</b> | GABA <sub>A</sub> |                   | GABA <sub>A</sub>         | GABA <sub>A</sub> | GABA <sub>A</sub>                  | GABA <sub>A</sub>                 |
| g (nS)                             | 3.8e-4            |                   | x                         | x                 | x                                  | x                                 |
| $\tau_r$ (ms)                      | 0.3               |                   | x                         | x                 | x                                  | x                                 |
| $\tau_d$ (ms)                      | 8.0               |                   | x                         | x                 | x                                  | x                                 |
| <b>CR<sup>+</sup> VIP<br/>INs</b>  | GABA <sub>A</sub> |                   | GABA <sub>A</sub>         | GABA <sub>A</sub> | GABA <sub>A</sub>                  | GABA <sub>A</sub>                 |
| g (nS)                             | x                 |                   | 1.9e-1                    | 1.9e-2            | x                                  | x                                 |
| $\tau_r$ (ms)                      | x                 |                   | 0.73                      | 1.3               | x                                  | x                                 |
| $\tau_d$ (ms)                      | x                 |                   | 5.1                       | 9.0               | x                                  | x                                 |

**Table S6**

## Supplemental Materials and Text

### Figure S1. LEC infection confirmed by confocal imaging and local recordings. Related to Figure 1.

(A) Cartoon illustrating the extent of viral infection in LEC with AAV-CaMKII-ChR2-eYFP. Generated from 25 representative high-resolution confocal images of patched brain slices containing LEC.

(B) Example confocal image of LEC expressing ChR2-eYFP (green).

(C) Positive control: ChR2 function in an infected LEC neuron. Top: Time-locked responses recorded in cell-attached mode in response to a maximum strength 10 Hz photostimulation train. Bottom: Large, excitatory photocurrent recorded in whole-cell configuration in response to 500 ms photostimulation. Enlarged photocurrent shown to the left. Photostimulation done over LEC.

(D) Negative control: Lack of viral infection in a non-infected CA1 PN. Same protocols used as in (C). Photostimulation done over CA1.

(E) Cartoon illustrating the distribution of somatic (blue) and dendritic (black) recordings along the proximal-distal and radial axes of hippocampal area CA1. Dendrites that exhibited LEC-driven dSpikes are represented by asterisks.

### Figure S2. Properties of CA1 PN compartments and monosynaptic drive from glutamatergic LEC inputs. Related to Figure 1.

(A) Additional examples of electrophysiological properties of CA1 PN dendrites. Left: 800 pA, 500 pA, and -350 pA dendritic current injection. Right: 800 pA, 200 pA, and -275 pA dendritic current injection. The dendritic membrane potential was maintained at -70 mV.

(B) Summary firing properties (left) and sag (right) in CA1 PN dendrites. Individual data are shown in gray. Mean  $\pm$  SEM are shown in black.  $n = 14$  dendrites.

(C) Resting membrane potential of CA1 PN distal dendrites. Mean  $\pm$  SEM:  $-62.73 \pm 0.92$  mV.  $n = 17$  dendrites.

(D) Input resistance of CA1 PN distal dendrites. Mean  $\pm$  SEM:  $287.8 \pm 39.1$  M $\Omega$ .  $n = 17$  dendrites.

(E) Additional examples of electrophysiological properties of CA1 PN somata. Left: 275 pA, 50 pA, and -250 pA somatic current injection. Right: 225 pA, 125 pA, and -300 pA somatic current injection. The somatic membrane potential was held at -70 mV.

(F) Summary firing properties (left) and sag (right) in CA1 PN somata. Individual data are shown in light blue. Mean  $\pm$  SEM are shown in blue.  $n = 43$  somata.

(G) Resting membrane potential of CA1 PN somata. Mean  $\pm$  SEM:  $-68.16 \pm 0.32$  mV,  $n = 51$  somata.

(H) Input resistance of CA1 PN somata. Mean  $\pm$  SEM:  $142.4 \pm 6.82$  M $\Omega$ ,  $n = 54$  somata.

(I) Example LEC-driven response in a CA1 PN soma recorded in control conditions (blue) and after application of TTX and 4-AP (dark blue), respectively.

### Figure S3. Derivative and phase plots of LEC-driven responses in CA1 PN distal dendrites. Related to Figure 2.

(A) Example LEC-driven post-synaptic responses, as shown in Figure 2A. Ordered by amplitude.

(B) Corresponding LEC-driven responses (top), derivative traces (middle), and phase plots (bottom) of the example dendrites, demonstrating the visible differences between LEC-driven dPSPs (shades of yellow, left) and LEC-driven dSpikes (shades of blue, right).

**Figure S4. Comparisons of various LEC-driven responses in CA1 PNs. Related to Figures 1 and 2.**

(A-G) Subthreshold versus suprathreshold LEC-driven responses in CA1 PN distal dendrites. Resting membrane potential ( $p = 0.1806$ ), recording location ( $p = 0.8798$ ), response amplitude ( $p = 0.0264$ ), time of peak ( $p = 0.1695$ ), rise time ( $p = 0.2112$ ), half-width ( $p = 0.0011$ ), maximum  $dV/dt$  ( $p = 0.0097$ ). Unpaired t-test with Welch's correction.  $n = 14$  dPSPs and  $n = 5$  dSpikes.

(H) Relationship between the recording location, amplitude, and maximum  $dV/dt$  value of the LEC-driven dendritic responses.

(I-O) Subthreshold LEC-driven PSPs in the dendrite versus soma.

(I) All light-evoked PSPs recorded in CA1 PN dendrites (left) and somata (middle). Individual data shown in gray. Average dendritic PSPs (black) and somatic PSPs (blue) are shown overlaid (left, middle) and directly compared (right).

(J-O) Compartment-specific differences in LEC-driven PSPs in the dendrite ("D") versus soma ("S"). Peak amplitude ( $p < 0.0001$ ), time of peak ( $p < 0.0001$ ), rise time ( $p < 0.0001$ ), half-width ( $p < 0.0001$ ), hyperpolarization amplitude ( $p = 0.0927$ ), input resistance ( $p = 0.0001$ ). Mann Whitney test.  $n = 14$  dendritic PSPs and  $n = 52$  somatic PSPs.

**Figure S5. Short-term plasticity dynamics and summation of LEC inputs onto CA1 PN somata and dendrites. Related to Figures 1 and 2.**

(A-E) Short-term plasticity dynamics measured in CA1 PN somata.  $n = 5, 5, 9, 9,$  and  $15$  somata, tested with  $1, 2, 4, 8,$  and  $10$  Hz photostimulation, respectively.

(A) Experimental strategy. Low strength (2-3% maximum) photostimulation trains were given at physiological frequencies (1-10 Hz). Photostimulation done over SLM.

(B) Example LEC-driven responses in CA1 PN somata.

(C) Paired pulse ratios (PPR) at various frequencies.

(D-E) First (D) and last (E) PPR measured in the experiments described in (A). One sample t-test comparing mean PPR to hypothetical mean = 1.

(F-K) Postsynaptic summation measured in CA1 PN somata.  $n = 13, 14, 14,$  and  $13$  somata, tested with  $2, 4, 8,$  and  $10$  Hz photostimulation, respectively.

(F) Experimental strategy. Maximum strength (100%) photostimulation trains were given at physiological frequencies (2-10 Hz). Photostimulation done over SLM.

(G) Example LEC-driven responses in CA1 PN somata.

(H) Amplitude ratios at various frequencies.

(I-J) First (I) and last (J) amplitude ratios measured in the experiments described in (F). One sample t-test comparing mean ratio to hypothetical mean = 1.

(K) Summary graph of peak response amplitudes, illustrating the lack of LEC-driven APs in CA1 PN somata. Individual data shown in faded blues. Average data shown in full opacity blues.

(L-O) Post-synaptic responses after repeated LEC input activity measured in CA1 PN distal dendrites.  $n = 5$  dendrites.

(L) Experimental strategy. Maximum strength photostimulation trains were given at 8 Hz to measure the dendritic post-synaptic responses after repeated photostimulation of LEC inputs. Photostimulation was done over SLM.

(M) Example LEC-driven dendritic response in a CA1 PN dendrite. Squares indicate dendritic spikes.

(N) First and last amplitude ratios measured in the experiment described in (L). One sample t-test comparing mean ratio to hypothetical mean = 1.

(O) Summary graph of the spike probability in CA1 PN somata (blue) and dendrites (black) during single, 2 ms (circle) or maximum strength, 8 Hz (diamond) photostimulation. AP probability was calculated for soma, whereas dSpike probability was calculated for dendrites.  $n = 17$  dendrites tested with single photostimulation; 5 dendrites tested with 8 Hz photostimulation; 50 somata tested with single photostimulation; and 19 somata tested with 8 Hz photostimulation. \* $p < 0.05$ , \*\*\* $p < 0.001$ .

**Figure S6. Interneuron subgroups in hippocampal area CA1, as defined by soma location. Related to Figures 4 and 6.**

(A) Left: Cartoon illustrating the distribution of recorded CA1 INs along the proximal-distal and radial axes of hippocampal area CA1. Right: Distribution of candidate interneuron populations and subpopulations in hippocampal area CA1, based on the quantification of tdTomato-labeled cells in CA1 layers, scaled by imaging volume.

(B-C) Interneurons categorized by their soma location in CA1.

(B) Percent of INs that responded to LEC axon photostimulation. Total  $n = 20$  SP VIP INs, 15 SLM VIP INs, 9 SP CCK INs, 14 SR/SLM CCK INs, 10 SO SST INs, 4 SP SST INs; 7 SP CR<sup>+</sup> VIP INs, 16 SR/SLM CR<sup>+</sup> VIP INs, 9 SP CCK<sup>+</sup> VIP INs, 16 SR/SLM CCK<sup>+</sup> VIP INs.

(C) Percent of LEC-driven INs that exhibited APs.  $n = 18$  SP VIP INs, 15 SLM VIP INs, 5 SP CCK INs, 14 SR/SLM CCK INs, 1 SO SST IN, 3 SP SST INs; 6 SP CR<sup>+</sup> VIP INs, 15 SR/SLM CR<sup>+</sup> VIP INs, 6 SP CCK<sup>+</sup> VIP INs, 15 SR/SLM CCK<sup>+</sup> VIP INs.

**Figure S7. Validation of optogenetic silencing in local Jaws-expressing VIP INs. Related to Figure 5.**

(A) Injection strategy. Same as in Figure 5A.

(B) Confocal images of hippocampal area CA1 of a VIP-Cre/Ai14 mouse, demonstrating the infection of tdTomato<sup>+</sup> VIP INs (red) with Jaws-GFP (green), spanning various CA1 layers (white insets, right).

(C) Experimental strategy. Targeted recordings and optogenetic silencing of local VIP INs in area CA1 (yellow-filled purple neurons) to validate Jaws function. Jaws<sup>+</sup> VIP INs were photostimulated with 625 nm light (maximum strength) for 10-1000 ms.

(D) Hyperpolarization amplitude recorded from Jaws<sup>+</sup> VIP INs upon photostimulation with 625 nm light. Mean  $\pm$  SEM shown in black.  $n = 31$  VIP INs.

(E) Positive control: 625 nm light can effectively silence action potential firing in Jaws<sup>+</sup> VIP INs.

(F) Spike frequency in Jaws<sup>+</sup> VIP INs during positive current injection before (purple) and during (red) photostimulation with 625 nm light. Individual data shown in faded colors. Averages shown in full opacity colors.  $n = 19$  VIP INs.

(G) Example hyperpolarization in a Jaws<sup>+</sup> VIP IN during photostimulation with different durations of 625 nm light (10 ms increments, up to 100 ms).

(H) Hyperpolarization amplitude during photostimulation with different durations of 625 nm light. Individual data shown in gray. Mean  $\pm$  SEM amplitude shown in red.

(I) Hyperpolarization amplitude, normalized to the maximum hyperpolarization, as recorded in (H). Mean normalized amplitude shown in black. Dotted vertical lines indicate where the normalized amplitude is at its maximum (50-60 ms).

(J) Representative confocal images demonstrating adequate (left) or poor (right) Jaws expression in CA1 VIP INs. Data collected from brain slices with poor or no Jaws expression were excluded from further analyses in this study.



(K) Relationship between Jaws expression and the effect of VIP silencing on LEC-driven dendritic (top) and somatic (bottom) responses. Linear regression lines and  $R^2$  values indicated. The slope is significantly non-zero for dendritic data ( $p = 0.0371$ ), but not for somatic data ( $p = 0.6088$ ).

**Figure S8. Effect of VIP IN silencing on LEC-driven dendritic and somatic responses in CA1 PNs. Related to Figure 5.**

(A) Additional example traces of subthreshold LEC-driven dPSPs in control (black) and -VIP INs (red) conditions. Dotted lines indicate the peak amplitude of the dPSP.

(B) Subthreshold LEC-driven dPSP parameters before and after VIP IN silencing, average values. Paired t-test.  $n = 18$  dendrites, 18 slices, 13 mice.

(C) Additional example traces of suprathreshold LEC-driven dSpikes in control (black) and -VIP IN (red) conditions.

(D) Suprathreshold LEC-driven dSpike parameters before and after VIP IN silencing, average values. Paired t-test.  $n = 5$  dendrites, 5 slices, 4 mice.

(E) Example traces of LEC-driven somatic PSPs in control (blue) and -VIP INs (red) conditions. Blue and red dotted lines indicate the peak amplitude of the PSP in control and -VIP INs conditions, respectively.

(F) LEC-driven somatic PSP parameters before and after VIP IN silencing. Paired t-test.  $n = 7$  CA1 PN somata, 5 slices, 3 mice.

\* $p < 0.05$ , \*\* $p < 0.01$ .

**Figure S9. Attempts to selectively silence CCK INs in area CA1. Related to Figure 5.**

(A-F) Strategy #1: AAV2.8-nEF-Con/Fon-iC<sup>++</sup>-eYFP virus in CCK-Cre/Dlx-Flp/Ai65 mice.

(A) Confocal image of a CCK-Cre/Dlx-Flp/Ai65 mouse injected into area CA1 with AAV2.8-nEF-Con/Fon-iC<sup>++</sup>-eYFP, incubated for 19 days. Bottom: iC<sup>++</sup>-expressing (TdTomato<sup>+</sup>/eYFP<sup>+</sup>) CCK INs in SLM (left) and SP (right).

(B) Example iC<sup>++</sup>-expressing CCK IN exhibiting depolarization and AP firing in response to 470 nm photostimulation.

(C) Response amplitudes of CCK INs tested 470 nm light only (left,  $n = 11$ ), tested with 470 nm and 625 nm (middle,  $n = 7$ ), and tested with all possible wavelengths (right,  $n = 4$ ). Different wavelengths of light were shined separately.

(D) Infected CCK IN exhibiting AP firing in cell-attached mode in response to 470 nm photostimulation at 10 Hz.

(E) Response amplitudes of CA1 PNs tested 470 nm and 625 nm photostimulation ( $n = 4$ ). Cells were blind-patched.

(F) Percent of patched cells that responded to 470 nm light. Total  $n = 11$  CCK INs and 4 CA1 PNs. All photostimulated CCK INs exhibited depolarization, rather than hyperpolarization (silencing).

(G-J) Strategy #2: Custom-made AAV2.9-hDlx-Flex-Jaws-TdTomato virus in CCK-Cre mice.

(G) Confocal image of a CCK-Cre mouse injected into area CA1 with AAV2.9-hDlx-Flex-Jaws-TdTomato, incubated for 2 weeks (left) and 6 weeks (right). Inset: infected neurons in various CA1 layers (middle).

(H) Representative light-evoked response in a Jaws-TdTomato<sup>+</sup> CCK IN in response to 625 nm photostimulation, 6 weeks after viral injection.

(I) Hyperpolarization amplitudes of all tested Jaws-TdTomato<sup>+</sup> CCK INs sampled, across various viral incubation periods.

(J) Firing properties of Jaws-TdTomato<sup>+</sup> CCK INs in control (black) and attempted silencing (red) conditions, 6 weeks after viral injection. Individual data shown in faded colors. Average data shown in full opacity colors. n = 8 CCK INs.

(K-P) Strategy #3: AAV2.5-CAG-Flex-Jaws-GFP virus in CCK-Cre mice.

(K) Confocal image of a CCK-Cre mouse injected into area CA1 with AAV2.5-CAG-Flex-Jaws-GFP (same virus as in Figure 5), incubated for 19 days.

(L) Example traces from a CCK IN, CA1 PN soma, and CA1 PN dendrite, demonstrating appropriate (CCK IN) or off-target (CA1 PN soma and dendrite) hyperpolarization in response to 625 nm photostimulation. CCK INs were patched in a targeted manner, based on GFP expression. CA1 PN somata and dendrites were blind-patched.

(M) Percent of patched cells that exhibited hyperpolarization in response to 625 nm photostimulation. Total n = 5 CCK INs, 22 CA1 PN somata, and 11 CA1 PN dendrites. CA1 PN somatic patch data is pooled. CA1 PN dendritic patch data is pooled.

(N) Hyperpolarization amplitudes of all tested CCK INs, CA1 PN somata, and CA1 PN dendrites, tested across various viral injection dilutions and incubation times. Standard protocol: non-diluted virus, 15-18 day viral incubation.

(O-P) Attempted experiment: effect of CCK IN silencing on LEC-driven dendritic responses in CA1 PNs.

(O) Confocal image of a CCK-Cre mouse, co-injected with AAV2.5-CAG-Flex-Jaws-GFP into CA1 and AAV2.9-CaMKII-ChR2-eYFP into LEC. Patched (and infected) CA1 PN was filled with biocytin and counterstained with streptavidin 647 (yellow). Both viruses are visible in green.

(P) LEC-driven response in the CA1 PN dendrite from (O), tested under control (black) and 625 nm photostimulation (red) conditions. Jaws virus and ChR2 virus were incubated for 9 days.

**Figure S10. Local VIP IN subtypes exhibit disinhibitory and inhibitory functions. Related to Figure 6.**

(A) Experimental strategy. Photostimulation (blue) of CR<sup>+</sup> VIP INs or CCK<sup>+</sup> VIP INs (light green) and somatic voltage clamp recordings from putative PNs (blue) and INs (red) in hippocampal area CA1. Neurons were held at +10 mV to record IPSCs.

(B) Proportion of recorded CA1 PNs and layer-specific INs that were inhibited by CR<sup>+</sup> VIP INs. Total n = 16 PNs, 11 SO INs, 9 SR INs, and 9 SLM INs.

(C) CR<sup>+</sup> VIP IN-driven IPSCs from responding CA1 PNs and layer-specific INs. Traces from individual neurons shown in gray. Average IPSC trace shown in blue (PN) or red (INs). Proportion of inhibited cells noted above the traces.

(D) Example morphological reconstructions of neurons inhibited by CR<sup>+</sup> VIP INs. Left to right (top): perforant path-associated cell, putative CCK<sup>+</sup> VIP IN basket cell, Schaffer collateral-associated cell. Left to right (bottom): CA1 PN, horizontal basket or axo-axonic cell, and OLM cell. Soma and dendrites shown in black. Axon shown in blue. Scale bars 100  $\mu$ m.

(E) Proportion of recorded CA1 PNs and layer-specific INs that were inhibited by CCK<sup>+</sup> VIP INs. Total n = 23 PNs, 11 SO INs, 11 SR INs, and 9 SLM INs.

(F) CCK<sup>+</sup> VIP IN-driven IPSCs from responding CA1 PNs and layer-specific INs. Traces from individual neurons shown in gray. Average IPSC trace shown in blue (PN) or red (INs). Proportion of inhibited cells noted above the traces.

(G) Example morphological reconstructions of neurons inhibited by CCK<sup>+</sup> VIP INs. Left to right: Schaffer collateral-associated cell, two CA1 PNs, and OLM cell. Soma and dendrites shown in black. Axon shown in blue. Scale bars 100  $\mu$ m.

**Figure S11. Model validation: CA1 PN intrinsic properties and dSpike generation. Related to Figure 7.**

(A-C) Top: simulated dendritic recordings (300  $\mu\text{m}$  from the soma, black). Bottom: simulated somatic recordings (blue).

(A) Example electrophysiological properties. Firing properties and sag were measured in response to simulated depolarizing or hyperpolarizing current injections, respectively. The compartment membrane potential was held at  $-70\text{ mV}$ .

(B-C) Example firing properties (B) and sag (C).

(D) Example dendritic spikes generated by the computational model.

(E) Box and whisker plots comparing simulated subthreshold and suprathreshold LEC-driven responses. Plus sign represents the mean. Mann Whitney test,  $n = 200$  dendritic PSPs and 200 dendritic spikes. \* $p < 0.05$ , \*\*\*\* $p < 0.0001$ .

**Figure S12. Simulation: compartment-specific inhibition blockade. Related to Figure 7.**

(A) Example LEC-driven responses in the model CA1 PN before and after compartment-specific inhibition removal. Top: dendritic recordings. Bottom: somatic recordings. Control dendritic and somatic recordings shown in black and blue, respectively. Complete inhibition removal shown in green. Distal dendritic, proximal dendritic, and somatic inhibition removal shown in red, orange, and yellow, respectively.

(B) Dendritic spike probability after removal of compartment-specific inhibition. Tukey's multiple comparisons test.  $n = 50 \times 1000$  trials.

(C) Box and whisker plots of LEC-driven dSpike amplitude (left) and half-width (right) recorded in control conditions and upon removal of compartment-specific inhibition.

(D) Box and whisker plots of LEC-driven dPSP amplitude (left) and half-width (right) recorded in control conditions and upon removal of compartment-specific inhibition.

(E) Box and whisker plots of LEC-driven somatic PSP amplitude (left) and half-width (right) recorded in control conditions and upon removal of compartment-specific inhibition.

(C-E) Dunn's multiple comparisons test.  $n = 100$  trials.

\* $p < 0.05$ , \*\* $p < 0.01$ , \*\*\* $p < 0.001$ , \*\*\*\* $p < 0.0001$ .

**Figure S13. Model validation: LEC-driven GABAergic INs in CA1. Related to Figure 7.**

(A) Example electrophysiological properties of the INs, generated by the model. Firing properties and sag were measured in response to simulated depolarizing or hyperpolarizing current injections into the IN soma, respectively. CCK IN: 350, 100, and  $-300$ , SST IN: 250, 100, and  $-200$ , CR<sup>+</sup> VIP IN: 150, 75, and  $-200$ , and CCK<sup>+</sup> VIP IN: 250, 100, and  $-200$  pA current injected. The trace generated from the middle current injection is shown in a darker color. The traces above the VIP INs zoom into the APs generated by the highest depolarizing current injection. The IN membrane potential was held at  $-70\text{ mV}$ .

(B) Percent of INs that responded to excitatory LEC inputs in the model.

(C) Percent of responding INs that exhibited LEC-driven APs in the model.

(B-C) Calculated from 10 runs of the model, with 200 trials per run.

**Figure S14. Simulation: Effect of IN deletion on LEC-driven dendritic activity and somatic output in a CA1 PN. Related to Figure 7.**

(A) Model circuit schematic, same as in Figure 7C.

(B) Box and whisker plots of LEC-driven dSpike amplitude (left) and maximum dV/dt (right) under control and IN deletion conditions. Simulated LEC-driven dendritic responses were classified as dSpikes if the maximum dV/dt > 10 mV/ms in control conditions.

(C) Box and whisker plots of LEC-driven dPSP amplitude (left) and maximum dV/dt (right) under control and IN deletion conditions. Simulated LEC-driven dendritic responses were classified as dPSPs if the maximum dV/dt < 10 mV/ms in control conditions.

(D) Box and whisker plots of LEC-driven somatic response amplitude under control and IN deletion conditions.

(B-D) Dunn's multiple comparison's test. n = 200 trials.

(E) Model circuit schematic (left) and description of activity patterns (right). The model was calibrated to produce LEC-driven APs in the CA1 PN soma through a combination of somatic depolarization and theta-filtered Poisson-like activity of excitatory LEC inputs at various frequencies (10-100 Hz). OLM INs were recruited within the microcircuit in the recalibrated model because the CA1 PN exhibited APs.

(F) LEC-driven action potential probability of the model CA1 PN under control and IN deletion conditions. Tukey's multiple comparison test. n = 10 x 1000 trials.

\*p < 0.05, \*\*p < 0.01, \*\*\*p < 0.001, \*\*\*\*p < 0.0001.

**Table S1. Morphological properties of the model GABAergic interneurons. Related to Figure 7.** d and L denote the diameter and length of the compartments, respectively.

**Table S2. Morphological properties of the model CA1 PN. Related to Figure 7.**

Prefix 'radT' in compartments correspond to the apical trunk, 'rad' to oblique dendrites, 'lm' to apical tuft, and prefix 'ori' to basal dendrites, respectively. d and L denote the diameter and length of the compartment.

**Table S3. Passive parameters and active ionic conductances for somatic, axonal, and apical dendritic trunk compartments of the model CA1 PN. Related to Figure 7.**

**Table S4. Passive parameters and active ionic conductances for basal (SO), apical tuft (SLM), and oblique (SR) dendrites of the model CA1 PN. Related to Figure 7.**

**Table S5. Passive parameters and active ionic conductances for all interneurons and their compartments when applicable. Related to Figure 7.**

**Table S6. Synaptic properties of the canonical circuitry. Related to Figure 7.**
